# Supplementary material for: Spatiotemporal Variation of the Indoor Mycobiome in Daycare Centers
Source: Research Square preprint supplement (doi:10.21203/rs.3.rs-147547/v1), 2021-01-19
Supplement: Supplementary file 2 [file f8688051b26c25d2a7b5db66.xlsx]

## Sheet: Main rooms
Month	p.value	OTU_id	Order	Family	Genus	Species
September	0.005	0150b179ac29368ca1fb52b200a61126bccdeaa2	Helotiales	NA	NA	NA
September	0.01	01f84bd6ab9b83783c7102dba383884fba58e89e	Agaricales	Hydnangiaceae	Laccaria	Laccaria_pseudomontana_SH1553072.08FU
September	0.035	0477c5eab565006cdd9a03f8ee3714776c632a5b	Agaricales	Tricholomataceae	Rugosomyces	Rugosomyces_carneus_SH1563370.08FU
September	0.005	04dd677a8bf95e4f901d0070d854623e4c2f9d91	Geastrales	Geastraceae	Geastrum	Geastrum_fimbriatum_SH1563406.08FU
September	0.005	082cdca51ee1afebe1949a72f35babb2af3a511e	Agaricales	Cortinariaceae	Cortinarius	Cortinarius_centrirufus_SH1545250.08FU
September	0.005	09676fe530e194d2f6e849a1cce8e7ed6d471f9a	Agaricales	Cortinariaceae	Cortinarius	Cortinarius_brunneus_SH1545225.08FU
September	0.02	0ae7986229319cb76ef568c87da89af3748c5d66	Agaricales	Tricholomataceae	Mycena	Mycena_galericulata_SH1542292.08FU
September	0.01	0c31ebb753cc3ce0f0fef4df04689f19458658b1	Polyporales	Polyporaceae	Polyporus	Polyporus_submelanopus_SH1520943.08FU
September	0.01	0cc4ebec8e23c0372986b8159fc3dc9cac46bcd6	Agaricales	NA	NA	NA
September	0.005	0d0e2c4d309d7f392ae2e475d48058aa5ee21363	Agaricales	Cortinariaceae	Cortinarius	Cortinarius_testaceofolius_SH1545266.08FU
September	0.005	0d6e0538aac67d0066a69e61281ff529e13f60b5	Boletales	Paxillaceae	Paxillus	Paxillus_involutus_SH1569017.08FU
September	0.035	0dba879ac6542e9f26841c6722bea25453a3c1ce	Russulales	Russulaceae	Russula	Russula_paludosa_SH1538841.08FU
September	0.01	0de54bf44f56781cbf2223282c493de112015a7a	Agaricales	Omphalotaceae	Gymnopus	Gymnopus_peronatus_SH1542668.08FU
September	0.01	0ea41e25330d7b0551ab0404282310c405e03680	Agaricales	Cortinariaceae	Cortinarius	Cortinarius_multiformis_SH1503719.08FU
September	0.015	0edca1e303c9797fac07ed34f1afdffdc78eb73c	Trechisporales	Hydnodontaceae	Trechispora	Trechispora_subsphaerospora_SH1180893.08FU
September	0.02	0efa84258f415e77d2a11ee67550acb45f095722	Trichosporonales	Tetragoniomycetaceae	Tetragoniomyces	Tetragoniomyces_uliginosus_SH1569908.08FU
September	0.015	0f24278e13f3fcc0268c6edad1d746d10733c593	Agaricales	Strophariaceae	Pholiota	Pholiota_flammans_SH1612234.08FU
September	0.005	0fa63ae254c7a41b8952efe839e2f732b1f6cdc5	Polyporales	Meruliaceae	Ceraceomyces	NA
September	0.02	0fb45b950678390c1fca85b543373e9c9e8593f9	Agaricales	Cortinariaceae	Cortinarius	Cortinarius_caesiobrunneus_SH1710019.08FU
September	0.05	103b306800fb1c459ee51eb39c008edf13f8b77b	Agaricales	Strophariaceae	Pholiota	Pholiota_abieticola_SH1563809.08FU
September	0.015	108e6780733bddd778f550c540eed26e1183727f	Thelephorales	Bankeraceae	Hydnellum	Hydnellum_gracilipes_SH1539910.08FU
September	0.025	11390c461810ba01c7ec46ce7336e28b523aa5b5	Polyporales	Podoscyphaceae	Hypochnicium	Hypochnicium_subrigescens_SH1523680.08FU
September	0.005	117a2ff075136ccfa6bf5490a37b5f35788ebbd8	Polyporales	Xenasmataceae	Cabalodontia	Cabalodontia_subcretacea_SH1650955.08FU
September	0.045	11a6500f59a71bee3aff62d8824b63a12cf1efc8	Helotiales	NA	NA	NA
September	0.02	11f80502903e64dcf4177add7598d07a9dcb9e91	Polyporales	Steccherinaceae	Antrodiella	Antrodiella_onychoides_SH1600348.08FU
September	0.005	12b01fc37f823f5ff8d842491f85dcc29aebb94e	Agaricales	Cortinariaceae	Cortinarius	Cortinarius_alboamarescens_SH1503971.08FU
September	0.04	143732072fe13a5a07f047292450976880dd123c	Russulales	Auriscalpiaceae	Lentinellus	Lentinellus_cystidiosus_SH1572477.08FU
September	0.045	14b3f90c4fabd3bdc415e62d1996588fa090cb12	Agaricales	Amanitaceae	Amanita	Amanita_excelsa_SH1558439.08FU
September	0.005	1505aa0d32b97e459b9a77466a14498241f77f71	Agaricales	Cortinariaceae	Cortinarius	NA
September	0.04	169e8fedf2ed909f86f7fee25493360c4a971602	Agaricales	Cortinariaceae	Cortinarius	Cortinarius_uraceisporus_SH1545348.08FU
September	0.005	174828e0eaf4a046e219b42b74d5fa60338b99f4	Agaricales	Agaricaceae	NA	NA
September	0.02	17876ef14d00124f8ffcc81d82888e816c10fb3a	Agaricales	Cortinariaceae	Cortinarius	Cortinarius_saginus_SH1503774.08FU
September	0.035	17e380e8c3644246289073c10dffeb9410a8410f	Agaricales	NA	NA	NA
September	0.015	1be75448e7df9da336b369422b02fcf5fc38a51f	Tremellales	Trimorphomycetaceae	Saitozyma	Saitozyma_paraflava_SH1565597.08FU
September	0.005	1c4af84a4a967a41d70768f8278ba5fed91445dc	Thelephorales	Thelephoraceae	NA	NA
September	0.01	1e5aa46ad530dcacbe2208fd1c91d01fd80f73a7	Agaricales	Psathyrellaceae	Psathyrella	Psathyrella_maculata_SH1508498.08FU
September	0.04	1fad19c471a1bb8f92b6eef08f4fe401e129ef03	Agaricales	Tricholomataceae	Tricholoma	Tricholoma_stans_SH1520327.08FU
September	0.015	1fe8b3b7b90e1687ca659c904bdb138aed59c938	Hypocreales	Stachybotryaceae	NA	NA
September	0.015	1ff5ee41ef99410d4d7e0dc0b5a1c549c7b61312	Thelephorales	Thelephoraceae	Tomentella	Tomentella_sublilacina_SH1502543.08FU
September	0.005	202a36a3c85b509602e94741c21149e47fcc0f9d	Polyporales	Steccherinaceae	Antrodiella	Antrodiella_semisupina_SH1206159.08FU
September	0.025	2101806171d7d799cb3a1ba47ed7516475558977	Microbotryomycetes_ord_Incertae_sedis	Chrysozymaceae	Spencerozyma	Spencerozyma_crocea_SH1529485.08FU
September	0.005	21edf6142cd15dc6c6e42bca58d64a389ecb8969	Cantharellales	Cantharellales_fam_Incertae_sedis	Sistotrema	Sistotrema_oblongisporum_SH1236721.08FU
September	0.01	23c42bf63e5341365c0e5eb85a5d1cb8278b146a	Gomphales	Gomphaceae	Phaeoclavulina	Phaeoclavulina_flaccida_SH1520221.08FU
September	0.005	241980f7e55a9c9c67431430d4aa882570669ffe	Agaricales	Tricholomataceae	Tricholoma	Tricholoma_argyraceum_SH1840362.08FU
September	0.035	24f0ae16b1d0af87eab6c0f11e788f11c002dd6d	Agaricales	Tricholomataceae	Cystodermella	Cystodermella_cinnabarina_SH1611192.08FU
September	0.005	260df3d61a4b6c0ae3bbe559e7b3bd687c831233	Cantharellales	Ceratobasidiaceae	NA	NA
September	0.01	262b7ab0a3b9489bb9e14574da1a2c252ac0f686	Agaricales	Strophariaceae	Tubaria	Tubaria_minima_SH1647181.08FU
September	0.035	29e3b12ef54e2651a6eed8cabacdd39687047870	Thelephorales	Bankeraceae	Sarcodon	Sarcodon_squamosus_SH1616478.08FU
September	0.015	2a3c083920750ce6daf2e108a5b608d907f59d6d	Agaricales	Strophariaceae	Galerina	NA
September	0.005	2a6180fe26ae4a3654bc4fc89e5d55dd33a8904f	Russulales	Russulaceae	Lactarius	Lactarius_torminosus_SH1519117.08FU
September	0.005	2acc66691d38c361380533c5376f7d31635d3bc6	Agaricales	Agaricaceae	Cystoderma	Cystoderma_amianthinum_SH1552050.08FU
September	0.025	2c5697641e2c5b2d9d81aeab388548c46fcb32c8	Agaricales	Inocybaceae	Inocybe	Inocybe_maculata_SH1553917.08FU
September	0.04	2c5dacf53df2f6d76303e2d58c810acf1bd1d9e0	Agaricales	Entolomataceae	Rhodocybe	Rhodocybe_gemina_SH1611274.08FU
September	0.005	2da73d1d512794b50f242c605f2faac7f6231b51	Agaricales	Cortinariaceae	Cortinarius	NA
September	0.005	2dd613291dc8c2cc9f850c8bd790c66b22cf96c6	Hymenochaetales	Tubulicrinaceae	Tubulicrinis	Tubulicrinis_medius_SH1505357.08FU
September	0.005	2ddc5cb84478edc0836160069aaae473617f499e	Agaricales	Pterulaceae	Pterula	NA
September	0.03	2e631b90d7c7e5694fa8d4d276c9060301add4a7	Agaricales	Hydnangiaceae	Laccaria	Laccaria_amethystina_SH1553023.08FU
September	0.005	2e663c208f8c2c084588c70d491df05963d0c4b5	Thelephorales	Bankeraceae	Bankera	Bankera_violascens_SH1643916.08FU
September	0.005	2efe28caaa9c4ccc30824026d84ebf6e6be9efec	Trechisporales	Hydnodontaceae	Trechispora	Trechispora_invisitata_SH1544424.08FU
September	0.005	307fc9219797aa2375f4c59b00830bb92023ea78	Sporidiobolales	Sporidiobolaceae	Rhodotorula	NA
September	0.005	31d6e5a7a8e8e02b99548bbed4b5c2c8438c7498	Agaricales	Strophariaceae	NA	NA
September	0.03	31fc849b8a33f7b37af681ab31cad9ba53bf47cf	Agaricales	Strophariaceae	Stropharia	Stropharia_cyanea_SH2089175.08FU
September	0.02	322b8de58c6ed4a526cdf6d90a54d692a4a71195	Agaricales	NA	NA	NA
September	0.005	3362dd71fdf575c56f4b22a3b02e08e72b0e7c78	Agaricales	Cortinariaceae	Cortinarius	Cortinarius_flexipes_SH1545275.08FU
September	0.01	339cb0a71195d183a635b09e8f264fef2f37e12e	Agaricales	Inocybaceae	Inocybe	Inocybe_mixtilis_SH1505180.08FU
September	0.005	341dc58c696af77249ea4da792e742b6740c8cd9	Agaricales	Tricholomataceae	Clitocybe	NA
September	0.005	34c1e04c20a3fac2b7404faa65ef1b83e3404512	Atheliales	Atheliaceae	Piloderma	Piloderma_byssinum_SH1544810.08FU
September	0.015	3587f6b79d8cff8f4168b336865a6febe9d29ade	Agaricales	Cortinariaceae	Cortinarius	Cortinarius_alpinus_SH2121722.08FU
September	0.005	367f7ef1effdb62f099065b6d3e48ea27dfe4a0e	Agaricales	Hydnangiaceae	Laccaria	Laccaria_proxima_SH1239474.08FU
September	0.005	371803b532cc59e133a97553a3abafc0119eeab4	Boletales	Suillaceae	Suillus	Suillus_pseudoalbivelatus_SH2260716.08FU
September	0.015	377d71b86e98d8f56a98b366310db45e635670da	Verrucariales	Verrucariaceae	Verrucaria	Verrucaria_muralis_SH1574609.08FU
September	0.005	37a2895cccb6ea101cb27edaa62fde873a5c5f8e	Hymenochaetales	Hymenochaetaceae	Asterodon	Asterodon_ferruginosus_SH1510294.08FU
September	0.005	37ac84b0535148f163d668cb0ba8a3ed2643674d	Agaricales	Cortinariaceae	Gymnopilus	Gymnopilus_picreus_SH1612286.08FU
September	0.03	383c57e69face7deaf1582a91c7d42db66792e7f	Pucciniales	NA	NA	NA
September	0.015	38a41d000d3b8254f252c4a16219a72c785433c4	Tremellales	NA	NA	NA
September	0.04	3c071fde86bf758d576b13242b510d4963893285	Agaricales	Strophariaceae	Pholiota	Pholiota_gummosa_SH1573032.08FU
September	0.005	3c3ab5b86d918848427d5bf98d7d491a11431077	Microbotryomycetes_ord_Incertae_sedis	Chrysozymaceae	Fellozyma	NA
September	0.05	3c7482ba7837544e8cde70d44e090783217ec7ff	Trechisporales	Hydnodontaceae	Brevicellicium	Brevicellicium_olivascens_SH1557101.08FU
September	0.015	3f9e7089117fee79e1e8da26ff7966004af7299c	Agaricales	Cortinariaceae	Cortinarius	Cortinarius_sanguineus_SH1503742.08FU
September	0.005	440a3e068b3fb82c7dd8dfbe97c1214830827a6f	Agaricales	Cortinariaceae	Cortinarius	Cortinarius_adalbertii_SH1545233.08FU
September	0.015	443f090ec87f2f2fb890aea4f640a3466c38c68b	Agaricales	Cortinariaceae	Cortinarius	Cortinarius_malachius_SH1545260.08FU
September	0.005	44f375730eb46569e281e3c3c3a98defb804a5f5	Agaricales	Tricholomataceae	Cystodermella	Cystodermella_adnatifolia_SH1611193.08FU
September	0.005	4535d103cf3e777cd70dc894124ae19b47011156	Agaricales	Cortinariaceae	Cortinarius	Cortinarius_camphoratus_SH1505976.08FU
September	0.005	4581b5736fcc7df12deea815745d09dfc49f681a	Agaricales	Tricholomataceae	Pleurocybella	Pleurocybella_porrigens_SH1539636.08FU
September	0.005	4605b91657dd97f7eeb19998162052d0a6c47a50	Agaricales	Psathyrellaceae	Coprinopsis	Coprinopsis_sclerotiorum_SH1186650.08FU
September	0.025	47682eec34ee837808870f020ce3d77a46590a76	Agaricales	Cortinariaceae	Cortinarius	Cortinarius_obtusus_SH1503855.08FU
September	0.005	49c1b704e97d7b5d35575f7ab8c7f023ed05d53f	Russulales	Russulaceae	Lactarius	Lactarius_rufus_SH1519106.08FU
September	0.005	4adb178e663925039501464034db895e2a5afaeb	Russulales	Albatrellaceae	Albatrellus	Albatrellus_ovinus_SH1635937.08FU
September	0.005	4bf7153eab04f798270063de65ce73123bb996b0	Microascales	Ceratocystidaceae	Thielaviopsis	Thielaviopsis_basicola_SH1635120.08FU
September	0.03	4e5baf88200ae503e56c599c6902a3c3a3132620	Pucciniales	Pucciniaceae	Puccinia	Puccinia_brachypodii_SH1598240.08FU
September	0.005	4e7eef7884db9f1263a572526255d558ce070f30	Atheliales	Atheliaceae	Amphinema	NA
September	0.045	4e8e99accd60dbf7a843c53487ce9376c2b33f44	Pucciniales	Pucciniaceae	Puccinia	Puccinia_graminis_SH1598229.08FU
September	0.005	4ea97022865f7e597b7413fcefbe3f89e61aaedd	Agaricales	Cortinariaceae	Cortinarius	Cortinarius_alborufescens_SH1551442.08FU
September	0.005	4ecfd6447d22684e9fc55130a0d48e63bef60b33	Agaricales	Tricholomataceae	NA	NA
September	0.01	50de6c641eff5adb26091ab97948455d1885460a	Agaricales	Cortinariaceae	Cortinarius	Cortinarius_uraceisporus_SH1545348.08FU
September	0.005	5102e71cb67fb7a50f26c09ffe4198637d145833	Agaricales	Cortinariaceae	Cortinarius	Cortinarius_anomalus_SH1503789.08FU
September	0.005	51a153552c56a09639dfd0ca78c0ddfbd0356170	Russulales	Lachnocladiaceae	Gloiothele	NA
September	0.005	535bf82003bccfd1ba7dd3f6fd0c11121192bf72	Agaricales	Strophariaceae	Hypholoma	Hypholoma_fasciculare_SH1639421.08FU
September	0.025	535ed0a3618529780906d878fe93bd6a12d95d01	Agaricales	Stephanosporaceae	Cristinia	NA
September	0.01	54c28e9d868d8122ec191fcbca0e7e96ec3644ac	Rhytismatales	Rhytismataceae	Rhytisma	Rhytisma_acerinum_SH1604680.08FU
September	0.025	56b2fccd47a8949a9f00e5798c69dc90bad70b6a	Boletales	Boletaceae	Boletus	Boletus_luridus_SH1556966.08FU
September	0.005	57fb7359260a7af8e940d6c15f59e170726f476c	Polyporales	Meruliaceae	Ceraceomyces	NA
September	0.015	58fdb1e3a498a1c032e42dc30bad729fd2a3c0ca	Agaricales	Inocybaceae	Inocybe	Inocybe_sindonia_SH1529135.08FU
September	0.025	5a6869ab96624234f21b6ae493d0e642b29304d3	Agaricales	Cortinariaceae	Cortinarius	Cortinarius_subfoetens_SH1661860.08FU
September	0.005	5ab669b1f3b537032df94ff9a654889b6324027e	Boletales	Boletales_fam_Incertae_sedis	Hydnomerulius	Hydnomerulius_pinastri_SH1540271.08FU
September	0.005	5b075e7ba4c795713062603ac72e6b2bf32b980e	Agaricales	Clavariaceae	NA	NA
September	0.015	5b132dc5249ff15ad684cf70ee9cd07f20b5e553	Sporidiobolales	Sporidiobolaceae	Rhodotorula	Rhodotorula_graminis_SH1558727.08FU
September	0.005	5da808877afe648d6d9f8769da4f5e666d7ceffa	Agaricales	Agaricaceae	Melanophyllum	Melanophyllum_haematospermum_SH1612116.08FU
September	0.015	5e4a1074d5fc722ed2a9c4fbf99adae5a451c1fb	Agaricales	Tricholomataceae	Mycena	Mycena_alba_SH1542188.08FU
September	0.005	60d656893c9fa7bd08a8918e9b749f0226ab0339	Trechisporales	Hydnodontaceae	Trechispora	Trechispora_stevensonii_SH1517540.08FU
September	0.01	61410b8a8ae0cddebd5e2a991c54773bd3a90c91	Agaricales	Tricholomataceae	Mycena	Mycena_pura_SH1554447.08FU
September	0.005	6296b26048b6426700134aec9cad8f8136177f90	Agaricales	Omphalotaceae	Gymnopus	Gymnopus_perforans_SH1570168.08FU
September	0.015	63b73fec6a335ecaa85ec2f47e75552b09fb8bea	Atheliales	Atheliaceae	Tylospora	NA
September	0.005	647b8c3e20bd1369cd52fad70c4d32e2a533b74f	Gomphales	Gomphaceae	Ramaria	Ramaria_corrugata_SH1519642.08FU
September	0.005	64e1f13d5c8e485c94938a0de6bae5dc70952782	Polyporales	Xenasmataceae	Xenasmatella	Xenasmatella_vaga_SH1554044.08FU
September	0.01	65b6b577dd636c914c52a756b45c143dcbb839ba	Russulales	Auriscalpiaceae	Lentinellus	Lentinellus_ursinus_SH1572465.08FU
September	0.005	663933263abc42bcafd9e24ae2d5aea664c144b0	Polyporales	Meruliaceae	Ceraceomyces	Ceraceomyces_sulphurinus_SH1573683.08FU
September	0.04	6713e23a9f52616dfe38b9f1807aa3f8184fb745	Agaricales	Inocybaceae	Inocybe	Inocybe_posterula_SH1611234.08FU
September	0.01	6721bf5f4a6247bcd53d977011ae112825001382	Agaricales	Psathyrellaceae	Homophron	Homophron_cernuum_SH1566138.08FU
September	0.01	67fbef7df3768735fa48c5fe56133dd51089c090	Cantharellales	Cantharellales_fam_Incertae_sedis	Sistotrema	NA
September	0.005	67fe4a9615401c9d84fb4961f8337e7778fbd587	Polyporales	Fomitopsidaceae	Postia	Postia_fragilis_SH1518084.08FU
September	0.005	6883e4b1af3f7e70dc97229b417048b24578685c	Agaricales	Psathyrellaceae	Coprinopsis	Coprinopsis_atramentaria_SH1566137.08FU
September	0.005	692caaec983acffc9e923bf19e83d77923f84e51	Agaricales	NA	NA	NA
September	0.015	697a54b382876b9dca46fc03ac46d40a706181e7	Agaricales	Cortinariaceae	Gymnopilus	Gymnopilus_penetrans_SH1626117.08FU
September	0.005	6adb05666238cdc14e67b34ff224924b42d778a1	Agaricales	Cortinariaceae	Cortinarius	Cortinarius_gentilis_SH1545387.08FU
September	0.005	6b490c51d9195476afd693146e69851575839ab7	Tremellales	NA	NA	NA
September	0.005	6c4fec3e032ef56911f50cb1edd6fe78cdf962f9	Agaricales	Cortinariaceae	Cortinarius	Cortinarius_armeniacus_SH1545226.08FU
September	0.04	6caad0ab7742663ab93900bc8a91464bfda6baf6	Russulales	Russulaceae	Lactarius	Lactarius_glyciosmus_SH1878804.08FU
September	0.045	6cdee73953add7d6e61a432f5bb7d11442696db1	Hymenochaetales	Schizoporaceae	NA	NA
September	0.005	6d97ddabb9dccd7a3c4ddc5584a2291c5d456b84	Agaricales	Psathyrellaceae	Coprinellus	Coprinellus_micaceus_SH1508477.08FU
September	0.02	6f547d1a27ec711d8558f7ea2990055234debda1	Gomphales	Gomphaceae	Ramaria	NA
September	0.005	70bd7a7fe364f5285159f200c5af8f33095e6ea4	Boletales	Suillaceae	Suillus	Suillus_variegatus_SH1555173.08FU
September	0.01	72f39723d0df51f145aabfec80e80657a1ac8b47	Agaricales	Tricholomataceae	Mycena	Mycena_pearsoniana_SH1542317.08FU
September	0.025	734c3ecf92706101aa926fe8b40c487b92f95b76	Agaricales	Cortinariaceae	Cortinarius	Cortinarius_acutovelatus_SH1503739.08FU
September	0.015	736eea5a1d702e904cc42b4e604a8b02a81cc612	Cantharellales	NA	NA	NA
September	0.045	739a63da582f0879f05e1bc8bc84f47d6cacd94b	Polyporales	Fomitopsidaceae	Postia	Postia_stiptica_SH1611667.08FU
September	0.005	73ec28de3de3467cbd0ffdb344ccd726ba056729	Agaricales	Agaricaceae	Cystoderma	Cystoderma_jasonis_SH1552049.08FU
September	0.005	751164af0b111addb70bb29d611b73fe17803936	Agaricales	Strophariaceae	Hypholoma	Hypholoma_lateritium_SH1639426.08FU
September	0.005	757ef8a3d6a63105e6300b7a0a7e70f76b6a8cbc	Agaricales	Pluteaceae	Pluteus	Pluteus_brunneidiscus_SH1604548.08FU
September	0.005	75a05c729db737ec0f5315447991a6fe6c1af9fb	Boletales	Paxillaceae	Paxillus	Paxillus_involutus_SH1569018.08FU
September	0.005	7752473a5b31cee5b7bf1825ff553a28778fff65	Polyporales	Meripilaceae	Rigidoporus	Rigidoporus_sanguinolentus_SH1558571.08FU
September	0.01	7869e997361b57a1e2c24120b36199c446745f1f	Agaricales	Tricholomataceae	Mycena	Mycena_septentrionalis_SH1646642.08FU
September	0.005	788412c1c6567189f48cb5312da7ba1150b1e8f4	Pucciniales	Coleosporiaceae	Chrysomyxa	Chrysomyxa_ledicola_SH1514958.08FU
September	0.045	78a502e3af7865e7db68174d03b2129c929b4955	Entylomatales	NA	NA	NA
September	0.005	78c238d9b553ab5eefc80151a5074ed83628dc28	Agaricales	Cortinariaceae	Cortinarius	Cortinarius_caperatus_SH1503722.08FU
September	0.025	78da492cf789701bb16ddfc4269f4113654cc917	Agaricales	Typhulaceae	Typhula	Typhula_filiformis_SH1570202.08FU
September	0.005	7a0e3735bb6092d155041909b77c2e829fa834b8	Thelephorales	Thelephoraceae	Tomentellopsis	Tomentellopsis_echinospora_SH1518330.08FU
September	0.005	7aac46bb15e09f2e0481caaef7321f14f9f9f90b	Russulales	Russulaceae	Lactarius	Lactarius_trivialis_SH1519120.08FU
September	0.005	7b06f00f45120bd22208ad17e0f8193875aa3251	Lecanorales	Ramalinaceae	Toninia	Toninia_physaroides_SH1549852.08FU
September	0.035	7b5509bf5f9c33a1581d6437e1c12b5e0ea0b7f7	Agaricales	Tricholomataceae	Leucocybe	Leucocybe_connata_SH1588952.08FU
September	0.005	7b7b362132ae5edf1034a378d3208693e7141564	Gomphales	Gomphaceae	Ramaria	Ramaria_stricta_SH1566828.08FU
September	0.005	7cc28c8839664bb4a0dde5597d12d19a461a9628	Polyporales	Meruliaceae	Ceraceomyces	NA
September	0.01	7d098491969732dadb97aa9ce8445f1c0e3a4333	Agaricales	Agaricaceae	Chlorophyllum	Chlorophyllum_olivieri_SH1519758.08FU
September	0.005	7e406b7b6a05c6e0c7fab0ee65e65289296b64a2	Chaetothyriales	Cyphellophoraceae	Cyphellophora	NA
September	0.005	7f29cd5b7a01ecf0c14f67629cf61a9be4999475	Cantharellales	Cantharellales_fam_Incertae_sedis	Sistotrema	NA
September	0.005	7f2f8f6b2a6413c00ba5c348b0903a5a721f7c59	Agaricales	Omphalotaceae	Rhodocollybia	Rhodocollybia_butyracea_SH1646573.08FU
September	0.005	7f3d5c4a18dd8843203f6bdc63dad5a9b0c3ef3c	Agaricales	Psathyrellaceae	Lacrymaria	Lacrymaria_subcinnamomea_SH1566136.08FU
September	0.005	814e3b1a7f63f3e34fb27d676373a194acbea65e	Russulales	Lachnocladiaceae	Gloiothele	Gloiothele_citrina_SH1611472.08FU
September	0.005	81b69d1da8a7b79f062fbe7b72a381c7830648ee	Agaricales	Cortinariaceae	Cortinarius	Cortinarius_bulliardioides_SH1504149.08FU
September	0.01	8201cfc48541f26e34f8ddc5413418cface3b2ea	Cantharellales	Cantharellales_fam_Incertae_sedis	Sistotrema	Sistotrema_muscicola_SH1506835.08FU
September	0.005	82948a1dc83867011ff77975375916c35e19d559	Russulales	Russulaceae	Lactarius	NA
September	0.015	82f747bcc5431e0760b7d2fbd61c07c2a5b09b03	Agaricales	Agaricaceae	Agaricus	Agaricus_hupohanae_SH1772423.08FU
September	0.005	8468686ae8ca1f69cc787cfa0d093d2574b89398	Cantharellales	Cantharellales_fam_Incertae_sedis	Sistotrema	NA
September	0.025	85f01e0a397e3a9b10e430c0ff6f53471fcdafeb	Sporidiobolales	Sporidiobolaceae	Rhodotorula	NA
September	0.005	86da5101c85f8b15c8f7a783ae639c960d86feb6	Agaricales	Cortinariaceae	Cortinarius	Cortinarius_pseudofervidus_SH1661868.08FU
September	0.005	872389132bee26efb57d1f04e021c38f53a3f9f5	Agaricales	Cortinariaceae	Cortinarius	Cortinarius_biformis_SH1545234.08FU
September	0.02	87259c5320a8bf1ba8c8892780d1e3fc16228e4b	Agaricales	Cortinariaceae	Cortinarius	Cortinarius_acutus_SH1503821.08FU
September	0.015	89eb671c767025d5ee2c20c8777183900c5a33e4	Boletales	Boletaceae	Boletus	Boletus_pinophilus_SH1644964.08FU
September	0.015	8c498aa56e1e6e3ca7ef5cf26331bf12f8c79b5f	Polyporales	Hyphodermataceae	Hyphoderma	Hyphoderma_setigerum_SH1540196.08FU
September	0.025	8ce2f04c124b39b82cb18f85fc2bae87bce72c9e	Russulales	Auriscalpiaceae	Artomyces	Artomyces_pyxidatus_SH1524920.08FU
September	0.005	8d46e807505a88e9244b54ac2248084afdce642a	Agaricales	Cortinariaceae	Cortinarius	Cortinarius_traganus_SH1545237.08FU
September	0.035	8d9b2607c4f08c268a0245e2b0d20b2294929983	Trechisporales	Hydnodontaceae	Trechispora	NA
September	0.01	8e57ca0ace3c4284c8f50458a7a8e34c8bd6161b	Agaricales	Psathyrellaceae	Coprinopsis	Coprinopsis_acuminata_SH1566143.08FU
September	0.005	8eea97f10629db3bbe521b6ca0ef680601e59f55	Agaricales	Strophariaceae	Hypholoma	Hypholoma_lateritium_SH1639426.08FU
September	0.005	8f136a7ce4281b026bd17de6a946ae98927bd7d3	Polyporales	Fomitopsidaceae	Postia	Postia_leucomallella_SH1571364.08FU
September	0.005	90166daa9480f0ece5fa65199c2776a53d87caf7	Trechisporales	Hydnodontaceae	Trechispora	NA
September	0.005	92f43f701274721c96076115726be91cfeefc504	Agaricales	Typhulaceae	Tygervalleyomyces	NA
September	0.045	93b8bb265e209fad1ab94df79bc5585c2484875b	Polyporales	Meruliaceae	Ceraceomyces	NA
September	0.045	94dc7ce807f6d4936ac308192efa5aa16fba17e2	Agaricales	Cortinariaceae	Cortinarius	Cortinarius_tubarius_SH1503854.08FU
September	0.015	94e565b505550addf2a73d748de6e424acd094ca	Thelephorales	Thelephoraceae	Pseudotomentella	Pseudotomentella_atrofusca_SH1638685.08FU
September	0.04	94f150143211cbb73f1d7cb2c7084fc4c3169acf	Cantharellales	Cantharellales_fam_Incertae_sedis	Sistotrema	NA
September	0.02	959440f9287ece09ae33f4b17ced5151c774091b	Agaricales	Tricholomataceae	Phaeolepiota	Phaeolepiota_aurea_SH1552055.08FU
September	0.005	96f74c2d1223dc12e87d3241e85464f54aa64817	Sporidiobolales	Sporidiobolaceae	Rhodotorula	NA
September	0.005	99e1103c078db7c4e433a7a38b6f2b7e92f11209	Boletales	Paxillaceae	Paxillus	Paxillus_involutus_SH1569016.08FU
September	0.02	9ae9e3e8ed82ece6854d7dd2f7048cd88a539912	Pucciniales	Pucciniaceae	Puccinia	Puccinia_hordei_SH1598236.08FU
September	0.005	9beeec8972762a3fd826740e3520dc5a53a564db	Boletales	Suillaceae	Suillus	Suillus_bovinus_SH1555175.08FU
September	0.01	9c0c55e8637e252f7dac34d7d06e16162a8b515a	Cantharellales	Cantharellales_fam_Incertae_sedis	Sistotrema	NA
September	0.005	9d78cc1dd5859d7fc14b5226e0d652881336348f	Saccharomycetales	NA	NA	NA
September	0.005	9d878b4a28dd3fc4e4cce4dbe531379e36c74d94	Thelephorales	Bankeraceae	Sarcodon	Sarcodon_imbricatus_SH1616479.08FU
September	0.04	9f20244db5e602b4e2324a05e63aba61b54c4290	Cantharellales	Ceratobasidiaceae	NA	NA
September	0.005	9f73a4175bd5a8b68a2bd959eb226c5f39783b4d	Trechisporales	Hydnodontaceae	Trechispora	Trechispora_byssinella_SH1564261.08FU
September	0.03	9fa46c597a7761fe68bafe32abce0595435a3dda	Agaricales	Cortinariaceae	Cortinarius	Cortinarius_lucorum_SH1545245.08FU
September	0.005	a11db87c3afdaf1c5f0b00ef8fbb8b473c790d61	Agaricales	Cortinariaceae	Cortinarius	Cortinarius_armillatus_SH1556103.08FU
September	0.005	a15502ac8b16426c2ee7e29698b1e8b1ebdbef47	Agaricales	Cortinariaceae	Cortinarius	Cortinarius_betuletorum_SH1551440.08FU
September	0.035	a47f1599802c7ff75f98eec06c18012101c6909a	Agaricales	Strophariaceae	NA	NA
September	0.015	a49df64cc145e18f1f81d7d94a501e10c0254594	Atheliales	Atheliaceae	Amphinema	NA
September	0.02	a74a14c402d5dbcb307bbdea0dc463f382738adb	Boletales	Tapinellaceae	Pseudomerulius	Pseudomerulius_aureus_SH1544146.08FU
September	0.005	a7753ab394116ad51e118ae10cc4c350b994c263	Erysiphales	Erysiphaceae	Golovinomyces	Golovinomyces_artemisiae_SH1607362.08FU
September	0.01	a78a9dccca34a1406af00454cb8a96c2163e07d5	Agaricales	Inocybaceae	Inocybe	Inocybe_fuscidula_SH1815528.08FU
September	0.02	a83296f2dec3d7aa5327c93935953023f2bc35ba	Gomphales	Lentariaceae	Lentaria	Lentaria_byssiseda_SH1611771.08FU
September	0.005	a92b52b780c9b9f60066f54ce3ef584edd0d2a00	Agaricales	Cortinariaceae	Cortinarius	Cortinarius_anomalus_SH1571723.08FU
September	0.005	ab267517d2b7bb73bf580a097cdf718ebcc03c16	Corticiales	Corticiaceae	NA	NA
September	0.025	ac733a24466d1ea3eec8add8f1bdaa1f9599323e	Agaricales	Tricholomataceae	Mycena	Mycena_rebaudengoi_SH1542295.08FU
September	0.005	acc44aad2cc838d91445617640c62231ca44831c	Russulales	Russulaceae	Lactarius	NA
September	0.005	ada5d3593deb5a2828029bdb05a18c59c5e0cd46	Polyporales	Fomitopsidaceae	NA	NA
September	0.005	b15b5d7d08f5fd63493c4b24c4e672c6d7a472a0	Agaricales	Inocybaceae	Inocybe	Inocybe_flocculosa_SH1564029.08FU
September	0.01	b19bff783d04b552d7fb00198b81483eead9502f	Agaricales	Cortinariaceae	Gymnopilus	Gymnopilus_picreus_SH1612285.08FU
September	0.01	b1b4e23658ba384855609e94056b5eecae4af9a0	Boletales	Boletaceae	NA	NA
September	0.015	b1fc5c2d7f9d8ae0f2b3123fefc1b3e43ca619f9	Auriculariales	Auriculariaceae	Auricularia	Auricularia_auricula-judae_SH1561131.08FU
September	0.01	b4dcd4f9b37ccfdbb102583458c5242a0cb199cc	Agaricales	NA	NA	NA
September	0.005	b522ac9e6c0aa95d15e783de7a942ad3bed24794	Agaricales	Tricholomataceae	Collybia	Collybia_cookei_SH1647769.08FU
September	0.005	b5734f84b3f33e6ac5119af83844297b6eb74328	Hymenochaetales	Schizoporaceae	Xylodon	Xylodon_brevisetus_SH1151787.08FU
September	0.005	b6494fe12be6da145396311499bf723276b6af0d	Russulales	Albatrellaceae	Albatrellus	Albatrellus_flettii_SH1612266.08FU
September	0.03	b6bd21de815312b21acff74fc37b2151e32b865c	Trechisporales	Hydnodontaceae	Trechispora	Trechispora_mollusca_SH1555566.08FU
September	0.005	b8318340c7a6e3a6cdada25ea8627642cd35e933	Agaricales	Tricholomataceae	Tricholoma	Tricholoma_fulvum_SH1520326.08FU
September	0.015	b8d9ad725e88cc729d9c85921255b4c526474587	Saccharomycetales	Saccharomycetales_fam_Incertae_sedis	Candida	Candida_quercitrusa_SH1516624.08FU
September	0.005	b9791969f911fc6bed6b25f425944d188c03a6f3	Agaricales	Tricholomataceae	Mycena	Mycena_rosella_SH1543425.08FU
September	0.015	bb1b470e46791e0d68f246e7de597e45e6f377f4	Glomerellales	Glomerellaceae	Colletotrichum	Colletotrichum_tofieldiae_SH2219019.08FU
September	0.005	bba52d8a19268bce72725862f92cee9172f9c6f2	Agaricales	Tricholomataceae	Cystodermella	Cystodermella_granulosa_SH1611191.08FU
September	0.005	bc4a9e2e9902bb229143af3057c8e5ec7c5705b1	Polyporales	Meruliaceae	Macrohyporia	Macrohyporia_dictyopora_SH1563054.08FU
September	0.025	bc4c9307a63d898463ea4fd872a6590350acc706	Trechisporales	Hydnodontaceae	Luellia	NA
September	0.01	bcf1622be67dc20c53afaf85935881d6e16eae9e	Agaricales	Lyophyllaceae	Tephrocybe	Tephrocybe_confusa_SH1150924.08FU
September	0.01	bd11bd8f16765e21ab033797a9dd71f217ddd6ff	Hymenochaetales	Schizoporaceae	Xylodon	Xylodon_erastii_SH1544162.08FU
September	0.01	be30fc1719c5db5a1cce32fa4f11cad5df4e53ce	Cantharellales	Ceratobasidiaceae	NA	NA
September	0.005	bf1b80f2aa1058a1ada836114f9fe844930d479b	Agaricales	NA	NA	NA
September	0.005	c08b1478e8fa74541b306737eb26f8bf3c137a5e	Cantharellales	Hydnaceae	Hydnum	NA
September	0.005	c09abcf236975ba13b255d1bf5766f5b38b24e23	Atheliales	Atheliaceae	NA	NA
September	0.02	c16dc526f5d5dafdd9c75e1d844dd0807868bf1f	Boletales	Boletales_fam_Incertae_sedis	Leucogyrophana	Leucogyrophana_sororia_SH1510266.08FU
September	0.015	c171141e03f58b8fba2bbbef824fd3d4a7107043	Russulales	Russulaceae	Russula	Russula_densifolia_SH1569599.08FU
September	0.045	c6096ae7dbe452f69dcc68cd830de213c944dc83	Diaporthales	Diaporthaceae	Diaporthe	Diaporthe_ellipicola_SH2209405.08FU
September	0.005	c764a64ce4b1c6a4e5629ef94d6b8c0f63e2d656	Agaricales	Cortinariaceae	Cortinarius	Cortinarius_comptulus_SH1545229.08FU
September	0.015	c7ed69871ee3c405787fbfd5c33a83912b3321f2	Agaricales	Strophariaceae	Galerina	Galerina_marginata_SH1563790.08FU
September	0.005	c80ea121a08bdc02c50f38a9411d8bb2ea47303c	Atheliales	Atheliaceae	Piloderma	Piloderma_sphaerosporum_SH1544806.08FU
September	0.015	c8fb0ec1f11047dde5f4e23d78e4bab0539c58aa	Gomphales	Lentariaceae	Hydnocristella	Hydnocristella_himantia_SH1651053.08FU
September	0.01	cafbaa9a3261fa14ea8e7dcf173fa5f39a4d0e25	Agaricales	Lyophyllaceae	Lyophyllum	NA
September	0.05	cc9b4540a346aa84463d9b4de1ab06c45fc365b4	Cantharellales	Cantharellales_fam_Incertae_sedis	Sistotrema	NA
September	0.005	cd0eeb354b5fcb85940ebebc0f46b8e46b003672	Agaricales	Cortinariaceae	Cortinarius	Cortinarius_spilomeus_SH1503748.08FU
September	0.005	ce848c09ef7735a649368fb6147439e1aa046b83	Agaricales	Crepidotaceae	NA	NA
September	0.02	cfe0a79ffe837d262a3331251c24a30d65c68cea	Polyporales	Meruliaceae	Ceraceomyces	NA
September	0.02	cfe8e02947b8fcc5ee972c298d90316968b1fbbc	Myriangiales	Elsinoaceae	Sphaceloma	Sphaceloma_bidentis_SH1613739.08FU
September	0.01	d131e59a5ae332c07dad8712c23ff0924ef41211	Atheliales	Atheliaceae	Byssocorticium	NA
September	0.01	d283ad00cb2751a377b0153dce78b2db00c8b775	Agaricales	Tricholomataceae	Megacollybia	Megacollybia_platyphylla_SH1638423.08FU
September	0.015	d2bde696c8a9256b966f8413b8a56c9a4f0c84e9	Agaricales	Cortinariaceae	Cortinarius	Cortinarius_suberi_SH1545254.08FU
September	0.005	d35ef67e34f96f725d342aedac2bc2a69cbf078a	Atheliales	Atheliaceae	Amphinema	NA
September	0.005	d574e810892ad5f081d8149f84fd295ea996caef	Thelephorales	Thelephoraceae	Tomentella	Tomentella_sublilacina_SH1502543.08FU
September	0.04	d5f2d0cabcb481787f6f5c2b6f40d692d2d8c2dc	Agaricales	Cortinariaceae	Cortinarius	Cortinarius_valgus_SH1545272.08FU
September	0.02	d88a60047d246870d7fff037450f7fa50bb44a4a	Trechisporales	Hydnodontaceae	Trechispora	Trechispora_stevensonii_SH1517540.08FU
September	0.02	d9647bc4bdb22d26ad75898b99d37510ed44ff05	Agaricales	Cortinariaceae	Cortinarius	Cortinarius_subtortus_SH1646824.08FU
September	0.005	db534220c7f5bad68e2e94f9e0382496f11155f6	Agaricales	Cortinariaceae	Cortinarius	Cortinarius_diasemospermus_SH1545221.08FU
September	0.005	dbcc0016285fab1d57008acfd45aa97329999667	Atheliales	Atheliaceae	Amphinema	NA
September	0.02	ded9f6bc0a14f4c52569990dc88f7abf88983f3c	Pezizales	Discinaceae	Gyromitra	Gyromitra_esculenta_SH1542936.08FU
September	0.005	dfe786ee0881a28bc72529a86667805c22f0952d	Agaricales	Inocybaceae	Inocybe	Inocybe_catalaunica_SH1632044.08FU
September	0.005	e1c6b99709cb8736b04a66401493b1ebea890c5a	Agaricales	Inocybaceae	Inocybe	Inocybe_napipes_SH1529087.08FU
September	0.03	e1d07cf745b8e1258d08b375d20ae3228222e331	Agaricales	Inocybaceae	Inocybe	Inocybe_lacera_SH1566522.08FU
September	0.015	e4d55378e3e0d2bf4c8140db64182842994aa051	Agaricales	Cortinariaceae	Cortinarius	Cortinarius_roseivelatus_SH1545417.08FU
September	0.005	e508a25b125663c413d0f8bdf65cafda0ca77900	Atheliales	Atheliaceae	Tylospora	Tylospora_fibrillosa_SH1571571.08FU
September	0.005	e5149e461afb82203ff18d804f80aa1d5a81b7f5	Cantharellales	Cantharellales_fam_Incertae_sedis	Sistotrema	Sistotrema_diademiferum_SH1244890.08FU
September	0.015	e55c825fc0d5530dc632044eca78674b5d5dd364	Glomerellales	Plectosphaerellaceae	Plectosphaerella	Plectosphaerella_cucumerina_SH1644402.08FU
September	0.03	e71190b631e142914f14ff2a4660ff455f06771d	Gomphales	Gomphaceae	Ramaria	Ramaria_pseudogracilis_SH1156983.08FU
September	0.01	eaf479527270469c960186246106130871ea52bb	Agaricales	Entolomataceae	Clitopilus	Clitopilus_cystidiatus_SH1574425.08FU
September	0.005	eb01d381890edc83a462d2f17584cbb402c4df75	Agaricales	Cortinariaceae	Cortinarius	Cortinarius_pholideus_SH1556104.08FU
September	0.005	eb1b26bd3dd7ce387dd234ea44da646a63c47355	Agaricales	Amanitaceae	Amanita	Amanita_muscaria_SH1553667.08FU
September	0.01	ee42e032e26ff5965d681973b593535a336ab4f1	Agaricales	Inocybaceae	Inocybe	Inocybe_soluta_SH1529209.08FU
September	0.015	eea622c16587abafeb56b41e50acb8885baba5fe	Agaricales	Cortinariaceae	Cortinarius	Cortinarius_bivelus_SH1545243.08FU
September	0.005	ef8704ba656f62e363507673bba4a4e50aec4caa	Polyporales	NA	NA	NA
September	0.045	efebd3a4f9ca32fad5e8f9186c94c58cf9b75a7d	Amylocorticiales	Amylocorticiaceae	Amylocorticium	Amylocorticium_cebennense_SH1241075.08FU
September	0.025	f041db185188edf896d98b1f1eb1e6fff88b2160	Russulales	Russulaceae	Lactarius	Lactarius_vietus_SH1519115.08FU
September	0.005	f2ec25b550d16274c5743e9f9eb767dc48220f87	Boletales	Sclerodermataceae	Scleroderma	Scleroderma_areolatum_SH1526178.08FU
September	0.03	f61a394be87bff95e7e1801873ca80860b575e59	Sporidiobolales	Sporidiobolaceae	Rhodosporidiobolus	NA
September	0.005	f8008430b4094c7b7b7e0323e717e9c485b06dd2	Agaricales	Cortinariaceae	Cortinarius	Cortinarius_cinnamomeus_SH1503716.08FU
September	0.025	fc210d3b03d55c479d65307a0303447a4fa1c9ad	Pleosporales	Pleosporaceae	Comoclathris	Comoclathris_rosae_SH1505870.08FU
September	0.01	fc34de92735b8487256e9bcab0941a797cdc1bba	Atheliales	Atheliaceae	Amphinema	Amphinema_byssoides_SH1648320.08FU
September	0.005	fd0209af6c4d3792941c95694b1203db67d348d4	Agaricales	Cortinariaceae	Cortinarius	Cortinarius_illuminus_SH1503759.08FU
September	0.01	fd3473fa248dd8d984f11c986e4e9b9556c265b3	Agaricales	Hygrophoraceae	Hygrophorus	Hygrophorus_agathosmus_SH1552726.08FU
September	0.005	fde8194247d86be73e71b9e462bc1d4f5f41a4b2	Agaricales	Tricholomataceae	Ampulloclitocybe	Ampulloclitocybe_clavipes_SH1611084.08FU
September	0.005	fdfd957380cea2417cfd06a2de60612fd5499a9c	Agaricales	Cortinariaceae	Cortinarius	Cortinarius_pseudofervidus_SH1661868.08FU
September	0.015	fea6c32714b57d43e0289e07cba16e304ff70fcb	Agaricales	Cortinariaceae	Cortinarius	Cortinarius_neofurvolaesus_SH1545248.08FU
September	0.005	ffb095adf708acd819163c2fc5c9380650d494f7	Agaricales	Cortinariaceae	Cortinarius	Cortinarius_dolabratus_SH1545253.08FU
October	0.005	00c4e6a127424a170a1032c9ca5061647925bf28	Agaricales	Cortinariaceae	Cortinarius	Cortinarius_evernius_SH1545255.08FU
October	0.005	01a30ee9060c3521e34569b190313a6aa79e9649	Agaricales	Cortinariaceae	Cortinarius	Cortinarius_aurantiobasis_SH1855733.08FU
October	0.025	0210355813415d50fb8deab8139d20711f1239fd	Erysiphales	Erysiphaceae	Golovinomyces	Golovinomyces_sordidus_SH2032895.08FU
October	0.02	02b9a113b9c2c16e3d1644cf29db3a8cdefebf71	Capnodiales	Dissoconiaceae	Dissoconium	Dissoconium_eucalypti_SH1930245.08FU
October	0.005	0389d705c2a3bf2f9abda80a7a80473536a6598e	Agaricales	Tricholomataceae	Clitocybe	Clitocybe_nebularis_SH1647753.08FU
October	0.01	05869db78f10f6ae67e7ea4ad3514462547b3b15	Agaricales	Strophariaceae	Stropharia	Stropharia_hornemannii_SH1639440.08FU
October	0.05	05b376d92f4d84e6f2858b83b428b34620810613	Verrucariales	Verrucariaceae	Verrucaria	NA
October	0.005	05b5337e58ed6f45fc3d7cddafef5f00457d7542	Agaricales	Tricholomataceae	NA	NA
October	0.025	07975fa5531177f87a6dfd336c55f1042cf857b7	Sporidiobolales	Sporidiobolaceae	Rhodotorula	NA
October	0.005	0b2fd4bd8122972980e27a2f0ccbf8c86d3db48d	Cantharellales	Hydnaceae	Hydnum	Hydnum_repandum_SH1539270.08FU
October	0.015	0dd73a0aa4382f7e9bdad2f368a0c8c4a2c28e8e	Agaricales	Tricholomataceae	Phyllotopsis	Phyllotopsis_nidulans_SH1572322.08FU
October	0.025	0e74fbaba0271c4babd610acb73e0ea7891c2118	Capnodiales	Mycosphaerellaceae	Ramularia	Ramularia_grevilleana_SH1577482.08FU
October	0.045	1285a7bad3825f7493fdfa5f55b0093294d898a2	Capnodiales	Teratosphaeriaceae	NA	NA
October	0.005	139a86e6e2d5fcbb74c843dbf0ed5b8cb95ccd90	Tremellales	Tremellaceae	Cryptococcus	NA
October	0.02	175cdc96b5166b1e618d638ff6d07693c69a8484	Sporidiobolales	NA	NA	NA
October	0.015	1ceeaeb98ba735708bab99215e0ab6a3c5def4bc	Cantharellales	Cantharellales_fam_Incertae_sedis	Sistotrema	Sistotrema_alboluteum_SH2129495.08FU
October	0.005	1e30d3556f98359bf7ae344a9abe316165b83361	Agaricales	Tricholomataceae	Tricholoma	Tricholoma_populinum_SH1681114.08FU
October	0.005	1f40154a1d5ea870a201aae724f86148501aaa8f	Polyporales	Podoscyphaceae	Hypochnicium	Hypochnicium_geogenium_SH1558796.08FU
October	0.045	1f7bd57af4151ccdc3c11a93d6d9911ea457ba91	Taphrinales	Taphrinaceae	Taphrina	Taphrina_padi_SH1519937.08FU
October	0.05	297836be5372aa283672272a254dfb076c08f578	Pleosporales	Phaeosphaeriaceae	Phaeodothis	NA
October	0.015	2ae00bc266dcc11ce42193c988a50ea49438e507	Agaricales	Tricholomataceae	NA	NA
October	0.005	2c118267d16c98787a7959485b79214ec4afbc35	Agaricales	Lyophyllaceae	Lyophyllum	Lyophyllum_decastes_SH1588957.08FU
October	0.015	2c51add9ddd222ec7f2163159dba93a0fe591c25	Atheliales	Atheliaceae	Piloderma	Piloderma_olivaceum_SH1544805.08FU
October	0.025	2da8a6e76f26e98ee5e592045165ca36aaafdd84	Agaricales	Cortinariaceae	Cortinarius	Cortinarius_hemitrichus_SH1545256.08FU
October	0.04	2f277b96f1d478b81c26ee7592d3ca9db1eccc21	Lecanorales	Stereocaulaceae	Stereocaulon	Stereocaulon_urceolatum_SH1647969.08FU
October	0.005	2f41c5759778f057b67606afd1879f92a7409d65	Agaricales	Tricholomataceae	Lepista	Lepista_nuda_SH1647751.08FU
October	0.005	302d25867a6f950a068f78e87aecd89a6894e2a3	Agaricales	Lycoperdaceae	Lycoperdon	Lycoperdon_pyriforme_SH1556524.08FU
October	0.035	30d1cd6495dbb17961d1bcb5d3e3d03150fbd201	Dothideomycetes_ord_Incertae_sedis	Dothideomycetes_fam_Incertae_sedis	Peltaster	Peltaster_cerophilus_SH1552940.08FU
October	0.04	33ee756b5d15b133bf28f1b6023504e6f0dcf8cf	Pleosporales	Leptosphaeriaceae	Ampelomyces	Ampelomyces_quisqualis_SH1548617.08FU
October	0.035	343fd17015f33125afbd6042129d5813edd2bb1c	Lecanorales	Ramalinaceae	Toninia	Toninia_physaroides_SH1549852.08FU
October	0.035	3458b95ee4c14958ddea8cb8e37688721975b71c	Thelephorales	Thelephoraceae	Tomentellopsis	NA
October	0.015	37693d59a5afb79c63260292183c75f3203f8605	Agaricales	NA	NA	NA
October	0.03	37e8e88f90b58a49c2263749c4ebf88ca31896a8	Agaricales	Lyophyllaceae	Tephrocybe	Tephrocybe_rancida_SH1588956.08FU
October	0.005	39adec449b1b88c9a9eb25301598fda275394cd4	Agaricales	Cortinariaceae	Gymnopilus	Gymnopilus_penetrans_SH1626113.08FU
October	0.035	3bde0cf27d07ed39faf40e29cbbfefc604d3e3da	Agaricales	Tricholomataceae	Mycena	Mycena_vulgaris_SH1542311.08FU
October	0.015	3cd38a05e6e71d9639615c4ffd5b729915928179	Polyporales	Podoscyphaceae	Hypochnicium	Hypochnicium_punctulatum_SH1524692.08FU
October	0.05	4051eee71fe231716514df0c8acdb95f165cd744	Pucciniales	Pucciniaceae	Puccinia	Puccinia_coronati-agrostidis_SH1598264.08FU
October	0.05	43a18febf120b96ec55295470e6f957d86b8e680	Xylariales	Sporocadaceae	Adisciso	Adisciso_kaki_SH1648930.08FU
October	0.005	472452aa68eb84ef8d7f880778a0637eb1687bb7	Agaricales	Cortinariaceae	Cortinarius	Cortinarius_coleoptera_SH1647023.08FU
October	0.005	4784f06b4c497f4978cc27a9ddd3f73c8d7e2213	Pucciniales	Pucciniastraceae	Melampsoridium	Melampsoridium_betulinum_SH1505727.08FU
October	0.005	49538e92c5b8586a64022c7b562c2b5b390d6aa1	Polyporales	Meruliaceae	Sarcodontia	Sarcodontia_spumea_SH1550155.08FU
October	0.005	4ae3f405f5cd43ccbc1a87e86e8c62d0319e0687	Boletales	Serpulaceae	Serpula	Serpula_himantioides_SH1598886.08FU
October	0.005	4f44adeaf15eec9dc688365825d4f0289851c9fa	Agaricales	Tricholomataceae	Mycena	Mycena_arcangeliana_SH1542330.08FU
October	0.01	532fb355cf9d6e60861e3eb349276a58ce0a04ee	Agaricales	Tricholomataceae	Melanoleuca	Melanoleuca_polioleuca_SH1556097.08FU
October	0.01	53a33c9ba065470a11da511c00d9c4e58660b831	Xylariales	Xylariaceae	Hypoxylon	Hypoxylon_rubiginosum_SH1544082.08FU
October	0.05	566256a1c51f86ee09f8760e1eb58b73ffb64ae1	Agaricales	Tricholomataceae	Macrocystidia	Macrocystidia_cucumis_SH1153182.08FU
October	0.01	5ae6c0292ca0446af0b0a0bb9561dc38cdcae4df	Polyporales	Meruliaceae	Phanerochaete	Phanerochaete_alnea_SH1745677.08FU
October	0.025	6254f2fb48f10b664f1b29625063f9f2867e7587	Agaricales	Tricholomataceae	Tricholoma	Tricholoma_terreum_SH1647743.08FU
October	0.035	63b4799d83fe415d1eb46063c57e78657250b1a5	Microbotryomycetes_ord_Incertae_sedis	Chrysozymaceae	Pseudohyphozyma	Pseudohyphozyma_pustula_SH1561793.08FU
October	0.015	6deee54e21913f607935dace9fc14d7dbda47248	Polyporales	NA	NA	NA
October	0.005	71b2571828fcb4271ae89a3f80ef3dee07258fae	Agaricales	Agaricaceae	Coprinus	Coprinus_comatus_SH1647713.08FU
October	0.005	72e9ff02e12b163786016c8799a7b25cf30a91aa	Agaricales	NA	NA	NA
October	0.035	76c337e9cf586b0c62dcfec159bc95f74fe66caa	Saccharomycetales	Saccharomycetales_fam_Incertae_sedis	Candida	NA
October	0.005	7afce6041e9e52339834b28acb99f474abe6a0d6	Agaricales	Strophariaceae	Pholiota	Pholiota_squarrosa_SH1611211.08FU
October	0.005	7c9193e2e8289cbd59b696e4fa0fb3415d6a51e9	Auriculariales	Exidiaceae	Basidiodendron	Basidiodendron_caesiocinereum_SH1549532.08FU
October	0.01	7e25332aa1c94274427791be6ee7bce72b096fae	Agaricales	Tricholomataceae	Tricholoma	Tricholoma_vaccinum_SH1520329.08FU
October	0.02	82a837be1bca61ebf67f0e97ea516152159e2dd8	Tremellales	Bulleribasidiaceae	Dioszegia	NA
October	0.02	86546f78a4e8c6bb95b083f5c0aa37a2c9793afc	Hypocreales	NA	NA	NA
October	0.02	8a3ca645bdf662995ebc3c1b31d4f242945e2dfc	Agaricales	Entolomataceae	Entoloma	Entoloma_cetratum_SH1569069.08FU
October	0.025	962fdb4ad5ffad148f35b1ef5b72f48331cb241b	Erysiphales	Erysiphaceae	Podosphaera	Podosphaera_xanthii_SH1243518.08FU
October	0.02	972050e58abf8730753ac593c909333e81237c10	Atheliales	Atheliaceae	Piloderma	Piloderma_bicolor_SH1544808.08FU
October	0.04	98f87f209bba3080a939d848db9128013e2f27e9	Saccharomycetales	Saccharomycetales_fam_Incertae_sedis	Candida	Candida_albicans_SH1570376.08FU
October	0.05	994f4796bd256cd71571044e6b31051b28c67ee2	Chaetothyriales	Herpotrichiellaceae	Veronaea	Veronaea_botryosa_SH1228064.08FU
October	0.045	9a64c08be3119a9a063e0e7f8dead60b9401fd89	Lecanorales	Ramalinaceae	Toninia	Toninia_physaroides_SH1549852.08FU
October	0.01	9e3ba2349b09774b8df0b227e878e12f238312f5	Helotiales	Dermateaceae	Oculimacula	Oculimacula_yallundae_SH1545871.08FU
October	0.005	9eba98ca914cd69f3c07e1e50499aa406f94cf5f	Auriculariales	Exidiaceae	Basidiodendron	NA
October	0.035	9ed7a04a2e8243886dadb2c8991dd00c808a356d	Tremellales	Tremellaceae	Tremella	NA
October	0.04	9ee1ee0599838eedebb2f6f8b7228135c217c63d	Lecanorales	Cladoniaceae	Cladonia	Cladonia_cornuta_SH1611841.08FU
October	0.005	9fd2d3fd56898e56ff4c5d04c9542fd413458b47	Agaricales	Tricholomataceae	Hemimycena	NA
October	0.005	a01d13f7256296493b5d62a2004b9aa3335f6d8c	Pucciniales	Melampsoraceae	Melampsora	Melampsora_laricis-populina_SH1572518.08FU
October	0.005	a0bf4c7b440a4a2bd2122fdfd495911d22eb1884	Helotiales	Dermateaceae	Marssonina	NA
October	0.005	a1ab4d635fa784ceefd0b0a542cd7e4ab6ca80a7	Pucciniales	Pucciniaceae	Puccinia	Puccinia_striiformis_SH1598238.08FU
October	0.005	a2fdb93849b276edbbf2345e81388fb98ec423db	Mucorales	Mucoraceae	Mucor	Mucor_piriformis_SH1650158.08FU
October	0.03	a34006435cd4b241577456c101b2fc559a35727e	Dothideomycetes_ord_Incertae_sedis	Dothideomycetes_fam_Incertae_sedis	Peltaster	NA
October	0.01	a3feb1c24f4f0a9f54dd11c105b12a140e4342fa	Spizellomycetales	Spizellomycetaceae	Triparticalcar	NA
October	0.005	a4250f59cd8d4df745c8605915c86b301b508b96	Agaricales	Strophariaceae	Hypholoma	Hypholoma_capnoides_SH1639423.08FU
October	0.025	a80dd577afdb9dad3058b5c8923f8d432d2caa26	Cantharellales	Clavulinaceae	Clavulina	Clavulina_sprucei_SH1550024.08FU
October	0.005	ab3243237711591f711bbe13a0f99f8e82dc4a67	Polyporales	Meruliaceae	Phlebia	Phlebia_tremellosa_SH1576304.08FU
October	0.005	af552b8a4704912b0b269003f10db55bf0fd76c5	Agaricales	Cortinariaceae	Cortinarius	Cortinarius_decipiens_SH1917130.08FU
October	0.02	b4d4cad5c79f0327d0c8f7a4f9f4342a378ddcb0	Agaricales	Strophariaceae	Hypholoma	Hypholoma_dispersum_SH1639432.08FU
October	0.01	b69bfc2feb0c2eb36d5f4e6131cfeae551808fd5	Pleosporales	Leptosphaeriaceae	Ampelomyces	Ampelomyces_quisqualis_SH1525089.08FU
October	0.015	b75629541db0b05b8dd01bb1df2b20450c891267	Agaricales	Cortinariaceae	Cortinarius	Cortinarius_obtusus_SH1503770.08FU
October	0.005	ba8c0eb109b18d101b118cc30e3e3ede06f2473c	Agaricales	Lyophyllaceae	Lyophyllum	Lyophyllum_decastes_SH1588949.08FU
October	0.025	bc43e1e0569f8ea044e42defe8a8dd04d84084ba	Thelephorales	Thelephoraceae	Pseudotomentella	Pseudotomentella_tristis_SH1564287.08FU
October	0.02	bce52cab9e06e3f390ef9f297d084e3cc36ab56d	Agaricales	Tricholomataceae	Tricholoma	Tricholoma_equestre_SH1158797.08FU
October	0.005	caffe00798348a95914149e58a7e272c95582642	Agaricales	Tricholomataceae	Tricholoma	Tricholoma_stiparophyllum_SH1647760.08FU
October	0.025	cbbd916d896feb7185cc4e5bf57ff1288b0554fc	Helotiales	Hyaloscyphaceae	Phialea	Phialea_strobilina_SH1564528.08FU
October	0.015	cdc7e7364fbf0878bf64f8267489f19d6482f92c	Xylariales	Apiosporaceae	NA	NA
October	0.005	ce1ad54b3cc482e10bec53a50c6f116d72e9d80f	Polyporales	Podoscyphaceae	Hypochnicium	Hypochnicium_lundellii_SH1514176.08FU
October	0.05	d1449ad9ed36595bb8bf0526039621077e7561d2	Agaricales	Cortinariaceae	Cortinarius	Cortinarius_pseudofallax_SH1917145.08FU
October	0.045	d60d91a6235dd4167e2f30a9007429b85f13548a	Polyporales	Meruliaceae	Phlebia	Phlebia_tremellosa_SH1576304.08FU
October	0.005	d957458e4b6495bfb705d8334f7be2909ef3480b	Agaricales	Cortinariaceae	Cortinarius	Cortinarius_saturninus_SH1545224.08FU
October	0.005	da464974efdfa0966017248d421fb3804be023bd	Agaricales	Tricholomataceae	Lepista	Lepista_personata_SH1647815.08FU
October	0.01	dd9bf0ee00391b012ba8024ae6d3174c1377b4d8	Atheliales	Atheliaceae	Piloderma	Piloderma_bicolor_SH1544821.08FU
October	0.005	ddaaa7222cfc11cf85c0e2c14545aa792d45dfd1	Microbotryomycetes_ord_Incertae_sedis	Chrysozymaceae	Chrysozyma	Chrysozyma_griseoflava_SH1522439.08FU
October	0.05	e2f71f99a838d8b42f392ffe1264312688bb418c	Agaricales	Tricholomataceae	Mycena	NA
October	0.015	e643fc3e261608e1112eeb7c8eaa37c7ce2e3754	Agaricales	Entolomataceae	Entoloma	Entoloma_conferendum_SH1569064.08FU
October	0.005	e66b41b5c1536090cd9b19fe1af27fac35d836f4	Agaricales	Lycoperdaceae	Lycoperdon	Lycoperdon_nigrescens_SH1556531.08FU
October	0.04	ea41cd78b1c118981a9bf45904c7a2efeb08b155	Tremellales	NA	NA	NA
October	0.005	ee681d804c7a65c13ec526c0933c882dc8c86078	Polyporales	Meripilaceae	NA	NA
October	0.05	f11d52a6d55b74dad7d8da4d8a7ffd5de321fbcd	Cantharellales	Cantharellales_fam_Incertae_sedis	Sistotrema	NA
October	0.005	f1dc21cd4aeaa1abca6b2961cb54d0c3ad264262	Capnodiales	Mycosphaerellaceae	Mycosphaerella	Mycosphaerella_ulmi_SH1558098.08FU
October	0.045	f72a2dca457055f8af16c7b64154d4914346785d	Dothideales	Aureobasidiaceae	Aureobasidium	NA
October	0.005	f771a68970e5102e101ef5a735da74227d499804	Erysiphales	Erysiphaceae	Phyllactinia	Phyllactinia_fraxini_SH1528127.08FU
October	0.02	fd2d97bd6f74e6c8a75d7760f87acd6a7113dade	Helotiales	Helotiaceae	Hymenoscyphus	Hymenoscyphus_albidus_SH1543049.08FU
October	0.045	fdce73ecb01876ec8a4420ba2f645abce8bcf868	Agaricales	NA	NA	NA
October	0.005	fea1389f54a6e7a3a1593cc0cc07f5708508432a	Polyporales	Meripilaceae	Rigidoporus	Rigidoporus_sanguinolentus_SH1558568.08FU
November	0.025	011f737fd2fc7d7d748ad4c006f724ae1631806e	Filobasidiales	NA	NA	NA
November	0.01	01a6bf762f3671edf18e58227f2fee2046c1d60a	Hypocreales	Clavicipitaceae	Metarhizium	NA
November	0.02	02a60c888542275b3c3055b505caad40454d5079	Helotiales	Helotiaceae	Hymenoscyphus	Hymenoscyphus_immutabilis_SH1543067.08FU
November	0.05	03f0f02ef472213c05e660c31375b98ea3c79e33	Atheliales	Atheliaceae	Piloderma	NA
November	0.045	04089ba2583b3f6566d80e17911e1243d0183813	Cantharellales	Cantharellales_fam_Incertae_sedis	Sistotrema	Sistotrema_oblongisporum_SH1236721.08FU
November	0.03	061f3b0258af80d28201a9138b6eebbc7443d0c2	Chaetothyriales	NA	NA	NA
November	0.04	06cc1c6099f583deea5c62ed5a485b7cf4b713ca	Capnodiales	NA	NA	NA
November	0.005	07ae143e1f4b8b5eee1a84c86a0a1a8db6e86f37	Lecanorales	Lecanoraceae	Rhizoplaca	Rhizoplaca_polymorpha_SH2130543.08FU
November	0.025	07d0bf0b757901e3f613201e5ef70d1d08bbb298	Chaetothyriales	NA	NA	NA
November	0.04	1109617c344208f17145e31588b3fe43e6ba68ff	Malasseziales	Malasseziaceae	Malassezia	Malassezia_dermatis_SH1553524.08FU
November	0.05	1879539bec49564095db01c0d0fe304e1ad76aa8	Tremellales	Tremellaceae	Cryptococcus	NA
November	0.05	1ac239e3bad7d697edc28834fb1e7188f671c361	Tremellales	Bulleraceae	Genolevuria	NA
November	0.005	1aee14ac5c51d832cc018ceffa6db8ebc7e40d27	Tremellales	Bulleribasidiaceae	Dioszegia	Dioszegia_butyracea_SH1609792.08FU
November	0.005	1b1db022cfcdb3d1532f50aee2abf5405e282925	Candelariales	Candelariaceae	Candelariella	Candelariella_coralliza_SH1614757.08FU
November	0.005	1d05b017c62f924d381cd4b11a5846f2562ac13e	Wallemiales	Wallemiaceae	Wallemia	Wallemia_ichthyophaga_SH1519847.08FU
November	0.02	1e5383ff1421498669b6707cf79ac2ac79bc73f6	Tremellales	Tremellaceae	Cryptococcus	NA
November	0.01	23e2877c7dcd2b3e0965dad5a536259aabb326cd	Erysiphales	Erysiphaceae	Erysiphe	Erysiphe_adunca_SH1517070.08FU
November	0.02	29e3eea052e9f541768955b091f97f280c912f2d	Capnodiales	Mycosphaerellaceae	Cercospora	Cercospora_sojina_SH1975056.08FU
November	0.045	2e742579f220c9d82f8f01f996827dfbe5fb0389	Orbiliales	Orbiliaceae	Orbilia	NA
November	0.005	2e791d80b0f78eefb78e0874ca25c7799740c735	Chaetothyriales	Herpotrichiellaceae	Exophiala	Exophiala_psychrophila_SH1635787.08FU
November	0.045	30fa876ac39d52af2a3ae9ff82ddca7dc4ba6c26	Pleosporales	NA	NA	NA
November	0.025	33475e8b9ba2dedeec32fb95282fcd27b1a9b4b7	Saccharomycetales	Saccharomycetales_fam_Incertae_sedis	Candida	NA
November	0.035	35cda999860096445c2f8ccf5dddfc05588efe09	Myriangiales	Myriangiaceae	Myriangium	NA
November	0.045	37781bd7f68b25407ae87722bf9308f11acc5b23	Pleosporales	NA	NA	NA
November	0.04	3b90700b3344001add7ecfd7be3d6bb72076cf5c	Pleosporales	Leptosphaeriaceae	Ampelomyces	Ampelomyces_quisqualis_SH1143242.08FU
November	0.04	3ec9911f201d4e2a468c1bca32639b96c353891b	Tremellales	Tremellaceae	Tremella	Tremella_moriformis_SH1142496.08FU
November	0.04	454cc7d74f78574a9bc8e6d13500580599146026	Glomerellales	Glomerellaceae	Colletotrichum	Colletotrichum_australe_SH2219838.08FU
November	0.02	45536375e8ab4d6d5d39f79fd18b72e4311e026a	Capnodiales	Mycosphaerellaceae	Zasmidium	Zasmidium_queenslandicum_SH1548078.08FU
November	0.045	48329ae35f8015db0cb6cb5bbd3f19528914e3cc	Trichosporonales	Trichosporonaceae	Apiotrichum	Apiotrichum_xylopini_SH1802139.08FU
November	0.035	48354c5bcaa6f2e38063adc9738384e5f6614635	Sporidiobolales	NA	NA	NA
November	0.035	498690af11b380bcd6c59a2bc97e7fced50b4362	Caliciales	Physciaceae	Rinodina	Rinodina_pyrina_SH1594792.08FU
November	0.05	4a5d431a2cf5cf4caab8f841eede42035d2a8b89	Venturiales	NA	NA	NA
November	0.045	501a7d674f122d2ca4eb08dfd28f7a3303eb51bf	Chaetothyriales	Herpotrichiellaceae	Exophiala	NA
November	0.03	522113e7e3143171b64113ed23c013fd239d5f8e	Tremellales	Tremellaceae	Cryptococcus	NA
November	0.05	5607f9cf290d5ea5846a4548e1c3d86f51ef4153	Hypocreales	Hypocreales_fam_Incertae_sedis	Acremonium	Acremonium_rutilum_SH1572978.08FU
November	0.01	58fe396476ce79e1b5cfa02aad28b2b30aaeb7b0	Erysiphales	Erysiphaceae	Erysiphe	Erysiphe_flexuosa_SH1527940.08FU
November	0.015	5953773cd382ca9dd21809fe7e705a03b96d0650	Capnodiales	Mycosphaerellaceae	Mycosphaerella	Mycosphaerella_punctiformis_SH2337135.08FU
November	0.015	5a42d0115e9b382121dde54a5717a711abadc881	Cantharellales	Ceratobasidiaceae	Ceratobasidium	NA
November	0.04	5f90da031b27217f60d103ca884423c7b4602dd4	Ustilaginales	Ustilaginaceae	Anthracocystis	Anthracocystis_flocculosa_SH1525276.08FU
November	0.02	603646585d65d54972661addfb69ca22489bb634	Helotiales	Helotiaceae	Ascocoryne	Ascocoryne_sarcoides_SH1551049.08FU
November	0.005	65611d2ec40d44ebd9bb87ef569ee7cb2ce66573	Chaetothyriales	Herpotrichiellaceae	Exophiala	Exophiala_crusticola_SH1515990.08FU
November	0.01	68c8df6c602c20a65e2782819fe9013cb3865af6	Chaetothyriales	Herpotrichiellaceae	Rhinocladiella	NA
November	0.03	69236e38c0fcdc5f57d033eb0b8ab4ef05ff039b	Russulales	Peniophoraceae	Subulicystidium	Subulicystidium_perlongisporum_SH1546030.08FU
November	0.01	6b0c4bdf72874c3faa0fa359a2de92a1b5e556d3	Tremellales	Bulleribasidiaceae	Dioszegia	NA
November	0.045	6b5e1b2a264c2f9b538d4ec2967d04a82e4c80d9	Chaetothyriales	Herpotrichiellaceae	NA	NA
November	0.015	6b9d6c652d726adbf18c53ba48329b65dc61a199	Xylariales	NA	NA	NA
November	0.005	722dee717cec2ffcce69ce938f8b39232f07526c	Tremellales	Bulleribasidiaceae	Dioszegia	Dioszegia_zsoltii_var._zsoltii_SH2037713.08FU
November	0.01	74bc0eeed8e7f2884ce5b083e3fe3043d89785ba	Tremellales	Bulleribasidiaceae	Vishniacozyma	Vishniacozyma_dimennae_SH1544136.08FU
November	0.015	756301f4b96946a4ebe5086cecf3e8ac1573c16c	Exobasidiales	Brachybasidiaceae	Meira	Meira_geulakonigii_SH1649630.08FU
November	0.035	7c0b47bf3b0d1ed2b5b53035fda868ec812322d5	Diaporthales	Gnomoniaceae	Ophiognomonia	Ophiognomonia_intermedia_SH2013466.08FU
November	0.015	7c9b7708e36107fa2b457d59f816eaa0f9a5a590	Filobasidiales	Piskurozymaceae	Piskurozyma	NA
November	0.05	7cc3f2a5cf9abe60afda9d8840c760fc58d9171d	Chaetothyriales	Herpotrichiellaceae	Exophiala	NA
November	0.035	7d4492ba48896f2cfd9c2e33446ac90d021fc162	Myriangiales	Myriangiales_fam_Incertae_sedis	Endosporium	NA
November	0.035	7ee1d4c431c7c46e1e5ece392663a78cf367f3c7	Lecanorales	Lecanoraceae	Scoliciosporum	Scoliciosporum_umbrinum_SH1155295.08FU
November	0.005	7f7342964db5eab96389318ee516ef901221a243	Xylariales	Xylariaceae	NA	NA
November	0.045	88f3cd3ea505f1f74a6423f29b3783d3792ec40b	Chaetothyriales	Herpotrichiellaceae	Cladophialophora	Cladophialophora_humicola_SH1616354.08FU
November	0.015	8ba86b4aafeecbc6d0fcaf483ad4eedcd2f26028	Atheliales	Atheliaceae	Athelia	NA
November	0.015	8ddfe886c9fd995fdbcd51d3462025041e49dbf8	Pleosporales	Phaeosphaeriaceae	Allophaeosphaeria	Allophaeosphaeria_cytisi_SH1233353.08FU
November	0.03	90d92bb2cc013bae7cb75ef654a23d6ef9d17f27	Hypocreales	Nectriaceae	NA	NA
November	0.04	928151e35c197c7fca9a88a726bd522dabe0e5fe	Lecanorales	Ramalinaceae	NA	NA
November	0.01	9a2fc83da7a9454fd2755e2a0403c41687d79fff	Verrucariales	NA	NA	NA
November	0.005	9a3769c4d07db579a56da64a8d562afe79b56147	Agaricales	Inocybaceae	Pellidiscus	Pellidiscus_pallidus_SH1243073.08FU
November	0.01	9a6e80989a28f710ce614fd28fb13333bb2897cc	Pleosporales	Massarinaceae	Stagonospora	NA
November	0.005	9b743f97ca38bd1426c0831983f7f29a07ac87e1	Agaricales	Tricholomataceae	Paralepista	Paralepista_flaccida_SH1551968.08FU
November	0.005	9cc0ebe175bf339ca43d753b2e5313df87d0bacf	Pertusariales	Megasporaceae	NA	NA
November	0.045	9d1ac7426762ee188b7f4998d3ec8b90050086ff	Diaporthales	Gnomoniaceae	NA	NA
November	0.03	9d556806c46f0016f9c7bd176d538a1a5cd0128b	Glomerellales	Plectosphaerellaceae	Plectosphaerella	NA
November	0.04	9eabe9943d9779f5fa9b8a1c40708c11417f0a1b	Capnodiales	Mycosphaerellaceae	Stomiopeltis	NA
November	0.005	9fb1332afb0c4b9b30e9e03989aaaebf97dfca91	Pleosporales	NA	NA	NA
November	0.05	a0f373e3b51ce2fda81b8a780055d9453fb343ec	Hypocreales	Hypocreaceae	NA	NA
November	0.03	a196cf7be81dfd1ee93cb3fbb3f53bf579124bf0	Trichosporonales	Trichosporonaceae	Cutaneotrichosporon	Cutaneotrichosporon_moniliiforme_SH1616872.08FU
November	0.015	a216571600e32196edf926685e27066cdbe7df56	Tremellales	Tremellaceae	Cryptococcus	NA
November	0.025	a2b47570df0c7dc21d8e63111bf459c7e15ea482	Cantharellales	Cantharellales_fam_Incertae_sedis	Sistotrema	NA
November	0.03	a921ac2eb0483623ce12a2e7b1d2273656481501	Agaricales	Entolomataceae	Entoloma	Entoloma_tenellum_SH1569082.08FU
November	0.025	ac726a789b37782c5e1466b848d5a049c899fe83	Myriangiales	Myriangiaceae	Myriangium	NA
November	0.035	b13100ed97c1990eec858ab553685f2ddfea12f3	Eurotiales	Aspergillaceae	Aspergillus	Aspergillus_tubingensis_SH1530717.08FU
November	0.01	b20e85e681344cdca5a7fb3a2cae041893d4104c	Onygenales	Onygenaceae	Aphanoascus	Aphanoascus_verrucosus_SH1188660.08FU
November	0.005	bbc2b97ba4759f28015b053ad963a7dcfa4b7561	Capnodiales	Mycosphaerellaceae	Cercospora	Cercospora_eucommiae_SH1577554.08FU
November	0.02	bd630358118b5334327db78e364554255cfd0b36	Eurotiales	Trichocomaceae	Thermomyces	Thermomyces_lanuginosus_SH1160830.08FU
November	0.01	c12af33bc54eaaf1d1babb5fc80585a0ecdaeb69	Chaetothyriales	Herpotrichiellaceae	Cladophialophora	NA
November	0.035	c6054f3b955b9521deee0b2c67acab5e2e64f311	Eurotiales	Aspergillaceae	Aspergillus	Aspergillus_appendiculatus_SH2321620.08FU
November	0.02	cebf0950aaa45d0359620e00b8a20ec5596d3b8f	Myriangiales	Myriangiaceae	Myriangium	NA
November	0.03	d2ea516ae9f578c5712d0af4337f168e16244701	Capnodiales	Teratosphaeriaceae	Phaeothecoidea	Phaeothecoidea_proteae_SH1234760.08FU
November	0.02	d7cc4ab5c4709d794a41ac228b466b5ed1d4ce62	Pleosporales	Lophiostomataceae	Sigarispora	Sigarispora_arundinis_SH1556698.08FU
November	0.02	d88d4aae410c999f05196cbc9b947ba1618457a8	Helotiales	Hyaloscyphaceae	Gyoerffyella	Gyoerffyella_tricapillata_SH1668795.08FU
November	0.05	dd68844227593a08d5501a82146afa1e4695a7e2	Atheliales	Atheliaceae	Piloderma	Piloderma_byssinum_SH1544819.08FU
November	0.01	e5f2a058adb7ded7aaf6eb7dc9e1a931106e1b67	Thelebolales	Pseudeurotiaceae	NA	NA
November	0.04	eb63aeaeac65cfb591a96d450f6fc3073ba2a989	Hypocreales	NA	NA	NA
November	0.005	ee37828eaf92c2eec982e68266750920a0888ab8	Polyporales	NA	NA	NA
November	0.005	f11a8b8a595cfe0ae097b176adc62a88f23b36ac	Tremellales	Rhynchogastremataceae	Papiliotrema	Papiliotrema_flavescens_SH1749681.08FU
November	0.015	f1397ccebf8cd94973d1c3e840fb766402361668	Eurotiales	Aspergillaceae	Penicillium	Penicillium_aethiopicum_SH2190001.08FU
November	0.02	f35bdf82ac151c29ce8532a9475c90273a33fdc3	Pleosporales	Pleomassariaceae	NA	NA
November	0.01	f46ee9272f8f0e4d8c9c4d5f957ebadd91da2675	Lecanorales	Ramalinaceae	Lecania	NA
November	0.05	fbf734289e84881651bfca901a3f3b0c1c6d640d	Chaetothyriales	Herpotrichiellaceae	Veronaea	Veronaea_compacta_SH1560867.08FU
March	0.03	0b3183cd40b6e3b1441a5bf4e67232124dcd3c00	Corticiales	NA	NA	NA
March	0.005	220bde37b07729742675e24172c4b5ab331fd3f6	Helotiales	Dermateaceae	Oculimacula	Oculimacula_yallundae_SH1545871.08FU
March	0.03	352d07c87ed8e10097c10757128ac207603ac5ee	Xylariales	Diatrypaceae	Eutypa	Eutypa_lata_SH1572193.08FU
March	0.01	3a9bb3ff6fe51f56716ae798972e82d8819bb25f	Saccharomycetales	Saccharomycetales_fam_Incertae_sedis	Candida	Candida_santamariae_SH1516580.08FU
March	0.04	40823347fdf10e0e51dac05f00b4e4ba8c070671	Glomerellales	Plectosphaerellaceae	Lectera	Lectera_longa_SH1644395.08FU
March	0.04	4244c8ed1f24eb9bfd2c16574f77274f66bfa221	Onygenales	Eremascaceae	Eremascus	Eremascus_fertilis_SH1542889.08FU
March	0.02	5ab2997574c3d5d5d44aac2b8c44095392cc1af4	Microbotryomycetes_ord_Incertae_sedis	Chrysozymaceae	NA	NA
March	0.045	6eaa592a43cf2e5d56bacf7e20ae668f1fa5f84c	Chaetothyriales	Herpotrichiellaceae	Veronaea	NA
March	0.05	7669137f9964ff83829a0285293cfbfe77282ea6	Kriegeriales	Camptobasidiaceae	Glaciozyma	Glaciozyma_martinii_SH1522747.08FU
March	0.035	76f578bd1a28eaa5758449694ed889f27b1b3c91	Chaetothyriales	NA	NA	NA
March	0.045	a6bfa9135e429b0e3cf020ebde552af5330be3b5	Trichosporonales	Trichosporonaceae	Trichosporon	Trichosporon_otae_SH1616898.08FU
March	0.04	ad97eb52bf08b1acdaf36935c5c13ec9b16e9fef	Lecanorales	Ramalinaceae	Toninia	Toninia_physaroides_SH1549852.08FU
March	0.005	b110b8bca90fd23ae372bc920c2cf354f6da54fe	Helotiales	Helotiales_fam_Incertae_sedis	Collembolispora	Collembolispora_aristata_SH1710846.08FU
March	0.02	b2af13b66db757523d528e17da2a5abf18471b49	Leucosporidiales	Leucosporidiaceae	Leucosporidium	Leucosporidium_fragarium_SH1651370.08FU
March	0.035	b9d60e1184a9aab7a4fc5b8e023308396754b9fb	Thelebolales	Thelebolaceae	Thelebolus	Thelebolus_globosus_SH1647615.08FU
March	0.01	c98aa1eb3ce37c780f6776095f853e04782334a9	Kriegeriales	Camptobasidiaceae	Glaciozyma	Glaciozyma_martinii_SH1522747.08FU
March	0.03	dfd559e87cf071719c95bb548929c43df11326f7	Mucorales	Mucoraceae	Mucor	Mucor_mucedo_SH1645304.08FU
March	0.015	e404db00efb918bd83b83df23b60343f8efc4640	Capnodiales	Capnodiaceae	Antennariella	Antennariella_placitae_SH1549163.08FU
June	0.03	01497f615adec0e4485472b5ebefeff69aa29327	Agaricales	Tricholomataceae	NA	NA
June	0.035	06b0da32af9d93defc51a0faac15c7daa66c91dd	Spizellomycetales	Powellomycetaceae	NA	NA
June	0.03	07159cd785534cf3a70f7508d539b4c492e80fab	Spizellomycetales	NA	NA	NA
June	0.005	0a20c089cb7adb48d2d95bdff3c4ff0a63ca8404	Tremellales	NA	NA	NA
June	0.02	1b8614712e6cbd2f05c85b4739f18e0224e93e5e	Diaporthales	Gnomoniaceae	Ophiognomonia	Ophiognomonia_otanii_SH1596913.08FU
June	0.005	24c6bbeeb006087c36071245d83527dac5c95b55	Polyporales	Fomitopsidaceae	Fomitopsis	Fomitopsis_pinicola_SH1519477.08FU
June	0.025	35f672d9e97f91796d728f405ae41b15f1ea6c86	Polyporales	Meruliaceae	Bjerkandera	Bjerkandera_adusta_SH1215497.08FU
June	0.015	4479440d716d81bfe9cb48f449737b97b96cf39c	Diaporthales	Gnomoniaceae	Ophiognomonia	Ophiognomonia_longispora_SH1596919.08FU
June	0.045	4de764f0e09de264ea77e10f2a3af0465c7cf889	Agaricales	NA	NA	NA
June	0.005	53df8a54d6d47632c324e9e84341ad8d77233c86	Polyporales	Hyphodermataceae	Hyphoderma	Hyphoderma_subsetigerum_SH1703610.08FU
June	0.005	55c33a7715aafd6978c5ceae4636a2bdcd078dd3	Erysiphales	Erysiphaceae	Podosphaera	Podosphaera_leucotricha_SH1508576.08FU
June	0.01	57e208a31c7b77de579c3003851e447566b476b4	Agaricales	Psathyrellaceae	Coprinellus	NA
June	0.05	5d0088f17f7121f6ed99285592ffdeb8d6bfa62e	Rhizophydiales	Alphamycetaceae	Betamyces	NA
June	0.005	6415016a21d6b0e1e69735089e08ec8f54f283dd	Polyporales	Polyporaceae	NA	NA
June	0.035	6da939c68360131c56db631e7f4841dc8339f1c7	Ustilaginales	Ustilaginaceae	Ustilago	Ustilago_trichophora_SH1615181.08FU
June	0.04	728974c495175abde6f34b77e1adf17a0a02533b	Mucorales	Mucoraceae	Mucor	Mucor_laxorrhizus_SH1548602.08FU
June	0.005	79503dc9fd04448c77cee48dc011c3d8dae51223	Polyporales	Meruliaceae	Phanerochaete	Phanerochaete_tuberculata_SH1184421.08FU
June	0.05	7d25dc07a4fe0641979d5175a1f27d880eb14373	Cantharellales	Ceratobasidiaceae	NA	NA
June	0.005	7d8c3d47aaf76c970943eb62ed075d2664c7afc3	Spizellomycetales	Powellomycetaceae	NA	NA
June	0.05	81906457696dc0673fca84f62c7a4b1f2ac3bd1d	Spizellomycetales	Powellomycetaceae	Powellomyces	NA
June	0.005	835e1827be09d6bbe2a0d841dc45187ce3df6a14	Umbilicariales	Ophioparmaceae	Hypocenomyce	Hypocenomyce_scalaris_SH1521798.08FU
June	0.015	8a0f7b14cc9bdb1a8c1532c934d9cba7ed54f225	Agaricales	NA	NA	NA
June	0.01	8c6b4bf1b2b14e2fd6c4dc3b3b3f752bf8fccfd0	Agaricales	Bolbitiaceae	Agrocybe	Agrocybe_praecox_SH1563803.08FU
June	0.05	8eca90f7bfcb34e9d2e8cdede1adc6ae810fc59b	Agaricales	Strophariaceae	Leratiomyces	Leratiomyces_percevalii_SH1639487.08FU
June	0.02	96f8e83bf932e768d26f1cafde87004408aca9d6	Orbiliales	NA	NA	NA
June	0.04	98aab8dfd9d697ab215189c3cc84dbcd607321f7	Pleosporales	Phaeosphaeriaceae	Leptospora	Leptospora_rubella_SH1595854.08FU
June	0.015	a1eb7ab0516ca012debe085d3943a4d491d916a6	Saccharomycetales	Saccharomycetaceae	Torulaspora	Torulaspora_delbrueckii_SH1561651.08FU
June	0.005	a7ca4d377e7ad1e6cd1e63f6dde0aa25b0e3eb9d	Hymenochaetales	Hymenochaetaceae	Phellinus	Phellinus_lundellii_SH1639859.08FU
June	0.015	ac107c07c63fb6d2baf397835a2b071923c27a17	Erysiphales	Erysiphaceae	Erysiphe	Erysiphe_lonicerae_SH1562868.08FU
June	0.005	ac5f4afba27fb7b1dd1f2ddebd1b994101f4b559	Cantharellales	NA	NA	NA
June	0.005	ac7e452931952071205173175e368fff9b6ac9b0	Tremellales	NA	NA	NA
June	0.025	b07cd8143040930be79b1c28f0446b0d0493bf85	Mucorales	Mucoraceae	Mucor	Mucor_hiemalis_SH1584792.08FU
June	0.005	b4c3f4040d4c8f3db91efcb201c2d41d249e09be	Agaricales	Lyophyllaceae	Calocybe	Calocybe_gambosa_SH1563371.08FU
June	0.01	b4d0bc83ff3e2c23ecf030e5452eca7d45ba8c23	Polyporales	Fomitopsidaceae	Cinereomyces	Cinereomyces_lindbladii_SH1519683.08FU
June	0.035	b90e5b6e3708bebe23072b5d0d8b57659ecc233b	Agaricales	Bolbitiaceae	Bolbitius	Bolbitius_titubans_SH1521616.08FU
June	0.04	bd580966536d3da455cb55bdd66b56f58658374b	Spizellomycetales	Powellomycetaceae	Powellomyces	Powellomyces_hirtus_SH1566856.08FU
June	0.005	cee74865e6ffca5db5c4970d3add22dc7e791041	Ustilaginales	Ustilaginaceae	Ustilago	Ustilago_nunavutica_SH1509408.08FU
June	0.035	d1757a46c927f164742bb01cec62bd8fb3e50a2c	Sporidiobolales	Sporidiobolaceae	Rhodotorula	NA
June	0.01	d1d941a94baabfaecbd0a4778a766d973197af79	Taphrinales	Taphrinaceae	Taphrina	Taphrina_carnea_SH1519948.08FU
June	0.035	d47c002f7eb413354a38fac2b8efab9ef65d1aa1	Helotiales	NA	NA	NA
June	0.035	d9e9e289171d98ed901880176f601943af0a82ec	Olpidiales	Olpidiaceae	NA	NA
June	0.015	df87fb599459142ffaa953d051cc43e21c0a1458	Helotiales	NA	NA	NA
June	0.04	e0d435d2e50905dee79c6aab533d9efbc0b5f978	Rhytismatales	NA	NA	NA
June	0.03	e123cff6a49956e25b48de877683679afe8925de	Leucosporidiales	Leucosporidiaceae	Leucosporidium	Leucosporidium_fragarium_SH1651381.08FU
June	0.05	e9754336ffcb9d95d6cf9705d317110517918a9f	Pleosporales	NA	NA	NA
June	0.005	e9a4be0288c64aa9782b612615c263fe848a0eb5	Spizellomycetales	Powellomycetaceae	Powellomyces	NA
June	0.05	e9d841ae930d7046198059024bbf6d1b2727981f	Tubeufiales	Tubeufiaceae	Acanthostigma	Acanthostigma_scopulum_SH1517084.08FU
June	0.01	f6d5d6a72ccf94e7d704c9707f6c7fcc0a75a936	Cantharellales	NA	NA	NA
July	0.015	01f6e4003c821abb8a653e4f62fa6db7795ff86d	Erysiphales	Erysiphaceae	Podosphaera	Podosphaera_fugax_SH1863241.08FU
July	0.01	0a69871862b5aeaca6d0e672f180c3ca55d685e7	Cystobasidiomycetes_ord_Incertae_sedis	Symmetrosporaceae	Symmetrospora	Symmetrospora_foliicola_SH1613476.08FU
July	0.03	11d836be32f1b4909fd2da16a40081a0a782b701	Xylariales	Microdochiaceae	Microdochium	NA
July	0.05	19059192fcd426978bc4b2d83d08d0786d90c8e5	Capnodiales	Mycosphaerellaceae	Zymoseptoria	Zymoseptoria_brevis_SH1577464.08FU
July	0.05	2147e80746f97f9b97736756d0267c3a37a0b635	Agaricales	Psathyrellaceae	Psathyrella	Psathyrella_fimiseda_SH1508524.08FU
July	0.02	2b110f2734543938df6a43e9bc4d14d5d978937f	Helotiales	Chaetomellaceae	Pilidium	Pilidium_concavum_SH1612864.08FU
July	0.035	3a38da392f926592af0f77d7738d9e1261024018	Helotiales	Helotiales_fam_Incertae_sedis	Kendrickiella	Kendrickiella_phycomyces_SH1517387.08FU
July	0.045	3b900ee8dc07a62d1de4e8a0f2666e16f6ebd447	Pezizales	Pyronemataceae	Cheilymenia	Cheilymenia_stercorea_SH1529948.08FU
July	0.05	3fae1ef8405cd67541cd455ed2d2bd76f6628e80	Leucosporidiales	Leucosporidiaceae	Leucosporidium	NA
July	0.02	41abcb1ca05568e12b27b874b6d6c28fcde5e888	Sporidiobolales	Sporidiobolaceae	Rhodotorula	Rhodotorula_ingeniosa_SH1651395.08FU
July	0.01	4b78b4fe358240fddbaebe729d8ccdf686deb087	Erysiphales	Erysiphaceae	Blumeria	Blumeria_graminis_SH1528354.08FU
July	0.005	5443ee7b6fd8d1c34509022e03ccaf4935449aea	Urocystidales	Urocystidaceae	Urocystis	Urocystis_agropyri_SH1552393.08FU
July	0.05	58f9095f708df86acead2f700e5904751d5d2ee0	Pleosporales	Pleosporaceae	NA	NA
July	0.005	6ccb4baffcc36dac02bbe2e7851b79fe58e8e4d1	Helotiales	Hyaloscyphaceae	Lachnum	Lachnum_rhytismatis_SH1184542.08FU
July	0.04	6d592edf5b28f84081ae1f1deb95a4aca2309b04	Amylocorticiales	Amylocorticiaceae	Amylocorticiellum	Amylocorticiellum_molle_SH1558566.08FU
July	0.03	6fd86755d43ca4e4d90da2e3d7e0787bbdf58f5a	Hypocreales	NA	NA	NA
July	0.03	7790856b7c6ef96dcd8883d2339bcab305822354	Trichosphaeriales	Trichosphaeriaceae	Nigrospora	NA
July	0.005	77ecdad750beb08bfd0e46755cec4257e8f6f4e8	Cystofilobasidiales	Cystofilobasidiaceae	Cystofilobasidium	Cystofilobasidium_macerans_SH1650091.08FU
July	0.015	7b486c777d4b8f4b58139a20d3f2263d6fbacecf	Orbiliales	Orbiliaceae	NA	NA
July	0.025	80e4d248c478d615b881d7f57a7687c3628c7ec6	Pleosporales	Didymellaceae	Didymella	Didymella_urticicola_SH1712311.08FU
July	0.045	82cfe5e0c90548a02813431dde50a70505177463	Helotiales	Dermateaceae	Oculimacula	Oculimacula_yallundae_SH1545871.08FU
July	0.005	87ad54b44bce1bb428f593dc883eed2f14a4fcd8	Pleosporales	Didymellaceae	Neoascochyta	Neoascochyta_desmazieri_SH1547065.08FU
July	0.005	8d27d85f86d1c9eea271f55c70dbbd3cff9100fc	Helotiales	NA	NA	NA
July	0.005	905a41dc08d6c73c396285c341e93b9aa111c5ad	Xylariales	Microdochiaceae	Microdochium	Microdochium_colombiense_SH1555476.08FU
July	0.005	983321d9719e7092a03ec6a4b2c40e5b82a3b2f9	Erysiphales	Erysiphaceae	Erysiphe	NA
July	0.005	98dba8d4b237f902d842ceebc3867336f4ede5f9	Agaricales	Lycoperdaceae	Bovista	Bovista_plumbea_SH1556538.08FU
July	0.02	9af0882f06a9ddb477b7c394c095fc85b7b0d7f8	Pleosporales	Phaeosphaeriaceae	Paraphoma	Paraphoma_chrysanthemicola_SH1576180.08FU
July	0.045	9f74a915c835afd567d957cdb0362f19ec66f39e	Hypocreales	Nectriaceae	NA	NA
July	0.03	a047c746eda297bbf29f90a54d85faf3c66b98d1	Pleosporales	Melanommataceae	NA	NA
July	0.015	a33c47fabd6e8b6afcffa13966f37b4855adf41f	Sordariales	Chaetomiaceae	NA	NA
July	0.005	b9e16c84363cb60c600d3f042878afa50d3a6df1	Agaricales	Psathyrellaceae	Coprinopsis	Coprinopsis_romagnesiana_SH1566149.08FU
July	0.005	bb6ed9e8d03bb4b823e03011bd9b667a0dd5fb19	Hypocreales	Nectriaceae	Gibberella	Gibberella_tricincta_SH1517618.08FU
July	0.01	c13b5167ec5adbd60e23e0af42cf0fcaae36dba4	Pezizales	Pyronemataceae	NA	NA
July	0.005	c4703ea904edb6558f0ffe5ce01f706719f00e71	Pleosporales	Didymellaceae	NA	NA
July	0.005	c9900448be78f29c3a2b493e1569d292e755cc59	Capnodiales	Mycosphaerellaceae	Phaeothecoidiella	Phaeothecoidiella_illinoisensis_SH1541673.08FU
July	0.01	c9ab6bd78b8e33f12cc77f444186ea4549e83043	Microbotryales	NA	NA	NA
July	0.02	d66dc2ec162885cdc7c65442809ee80db8e485ae	Filobasidiales	Filobasidiaceae	Filobasidium	Filobasidium_stepposum_SH2525086.08FU
July	0.01	dbde515856e4f4a063b4636802f50f92772cea53	Glomerellales	Glomerellaceae	Colletotrichum	Colletotrichum_higginsianum_SH2219026.08FU
July	0.005	ddef9e3d5b27b0b8d19841c256620518d1f65e99	Holtermanniales	Holtermanniales_fam_Incertae_sedis	Holtermanniella	Holtermanniella_takashimae_SH1610807.08FU
July	0.05	e469c3202f3a477edf1d130baede425373d48e6e	Hypocreales	Stachybotryaceae	Myrothecium	Myrothecium_verrucaria_SH1561027.08FU
July	0.05	e6f2e832a4e327d3a79a90b3e37e3158eb50faf6	Chaetothyriales	Herpotrichiellaceae	Veronaea	Veronaea_compacta_SH1560867.08FU
July	0.005	e87b5769dc3961f665be6a19494f3deaf73115c0	Tremellales	Tremellaceae	Cryptococcus	NA
January	0.015	009d46c575554985b5839f8c0e74fa79c011347c	Polyporales	Ischnodermataceae	Ischnoderma	Ischnoderma_benzoinum_SH1553933.08FU
January	0.035	021e562b29774dcb67b75ff521d39525c2cf6484	Cystofilobasidiales	Mrakiaceae	Udeniomyces	Udeniomyces_puniceus_SH1560793.08FU
January	0.01	1389ab1f7efd2df29ad4e2f67087e0298131732c	Malasseziales	Malasseziaceae	Malassezia	Malassezia_globosa_SH1565714.08FU
January	0.045	19ec521f786eb2d04e5525a2532f970fc8cde19e	Exobasidiales	Exobasidiaceae	Exobasidium	Exobasidium_arescens_SH1514437.08FU
January	0.02	1e22e05c315703aaf7481bdd7132670351b86146	Russulales	Stereaceae	Amylostereum	Amylostereum_laevigatum_SH1707180.08FU
January	0.02	23070546374c655b145ee50faf8268f25aa18981	Sporidiobolales	Sporidiobolaceae	Rhodosporidiobolus	Rhodosporidiobolus_colostri_SH1558736.08FU
January	0.05	255b12b8458137ac0e2796968ae7832fb44fce90	Polyporales	NA	NA	NA
January	0.045	3fb3910702d63110eed0967fc8397234a44edcad	Dothideales	Aureobasidiaceae	Aureobasidium	Aureobasidium_pullulans_SH1515060.08FU
January	0.01	4c61ed9d50b9c7aedc0507c06112d436b9b5b444	Tremellales	Bulleribasidiaceae	Vishniacozyma	Vishniacozyma_victoriae_SH1528207.08FU
January	0.015	79efe89cabd3d1623bbb5b89a1f9deec936a0c05	Malasseziales	Malasseziaceae	Malassezia	Malassezia_sympodialis_SH1553523.08FU
January	0.005	9bf7a5a8d4b28403375956c06ff59f7db0d27929	Agaricales	Tricholomataceae	Panellus	Panellus_mitis_SH1611200.08FU
January	0.025	b0bbcfeb2fa943cfeb8d134b5b0f14a9649ea9fc	Agaricales	Tricholomataceae	Panellus	Panellus_violaceofulvus_SH1562904.08FU
January	0.04	c740596e3786c1c335951573b55c16f5116b8541	Cystobasidiomycetes_ord_Incertae_sedis	Symmetrosporaceae	Symmetrospora	Symmetrospora_foliicola_SH1613476.08FU
January	0.005	e3c10be74a9c47666c961ba221d8c763426a72d2	Agaricales	Tricholomataceae	Panellus	Panellus_serotinus_SH1557736.08FU
February	0.04	f39d8466c126bb4c1a772c6a8c1e6bc7c43fc3a4	Xylariales	Diatrypaceae	Eutypella	NA
December	0.035	7af66ae6216bb6e3377c2c14e14ba77e03d32ada	Chaetothyriales	Herpotrichiellaceae	Rhinocladiella	NA
December	0.01	8d9f8f65de1d6a7044f833ea11f647769c3d68bf	Saccharomycetales	Saccharomycetaceae	Saccharomyces	Saccharomyces_paradoxus_SH2466103.08FU
December	0.015	98d53c4e732608136e964ea1b7db3586d7ec71dc	Tremellales	Cuniculitremaceae	Kockovaella	Kockovaella_schimae_SH1523566.08FU
December	0.03	a48f8461c8300bcc9e28007398778d2c7f298975	Lecanorales	Lecanoraceae	Lecanora	Lecanora_saligna_SH1507203.08FU
December	0.005	c809bb6876298a35dadc67f96f75ed3ac803a936	Capnodiales	Mycosphaerellaceae	Septoria	NA
December	0.04	da586ff414150c72360fccea26e4c2c421e1985d	Hypocreales	NA	NA	NA
December	0.015	eb34638623357d80308c5bf2794705da5d6f7415	Chaetothyriales	Cyphellophoraceae	Cyphellophora	Cyphellophora_sessilis_SH1636083.08FU
December	0.015	f51e0bc25cde71e659bb910164ca0913fe064c75	Xylariales	Apiosporaceae	Arthrinium	Arthrinium_rasikravindrae_SH1703425.08FU
August	0.015	00065ec856b42c4edd51e75dac3dcbe532ca63cb	Sebacinales	Serendipitaceae	Serendipita	NA
August	0.02	0091138d4b8bae51a0be1fbcb8b271af9d6fb42d	Polyporales	Hyphodermataceae	Hyphoderma	Hyphoderma_nemorale_SH1155973.08FU
August	0.005	02a938408d724d00a813edd28af524faedc54112	Polyporales	Meruliaceae	Byssomerulius	Byssomerulius_corium_SH1510718.08FU
August	0.045	02c15bcb8af79a94429038b77e3858ff43a25812	Entylomatales	Entylomataceae	Entyloma	Entyloma_holwayi_SH1516872.08FU
August	0.005	046a5ac02fb6b9f8dae844aa41c88ea2c40fa027	Tremellales	Tremellaceae	Cryptococcus	NA
August	0.03	048493a43c37f3d184fa4d570b3f4c3c51c1b3f9	Rhytismatales	Rhytismataceae	NA	NA
August	0.005	04bd38b74e7b2f191b844fe7e21d47b8463c4fff	Pezizales	Sarcosomataceae	Pseudoplectania	Pseudoplectania_nigrella_SH1508220.08FU
August	0.005	0541b24f1033a4ca3ede67e004d644572169d61e	Russulales	Lachnocladiaceae	Scytinostroma	Scytinostroma_odoratum_SH1510289.08FU
August	0.01	057dfb1478d9ef99d96fae52d29e7a0467c4b0bf	Polyporales	Xenasmataceae	Xenasma	Xenasma_tulasnelloideum_SH1554045.08FU
August	0.02	06429644e746be84d5c2cde064edd6f3baa3abb3	Polyporales	Fomitopsidaceae	Dacryobolus	Dacryobolus_sudans_SH1649847.08FU
August	0.005	086886f7f290d7d073fa697d545b584df8d783b4	Pleosporales	NA	NA	NA
August	0.015	091a26567bcd81871b63a494940067e30dbaf53b	Xylariales	NA	NA	NA
August	0.005	0a5aeb3b2182e19d006443777bb8841942dd6eac	Cantharellales	Ceratobasidiaceae	Ceratobasidium	NA
August	0.005	0a9a3a67088dbf240916b693ac5b320381743b62	Cantharellales	Cantharellales_fam_Incertae_sedis	Sistotrema	Sistotrema_raduloides_SH1519451.08FU
August	0.01	0b5cf5fdebcce439e9fce589c971574faf7ef3cb	Polyporales	Polyporaceae	Dichomitus	Dichomitus_campestris_SH1520939.08FU
August	0.005	0ba8dc4f882fdba7ee35a113459cec6329a9d3c6	Polyporales	Meruliaceae	Bjerkandera	Bjerkandera_adusta_SH1215497.08FU
August	0.02	0c3c05bd54f93adc9f34f50cd896ca86e9567231	Hymenochaetales	Schizoporaceae	Xylodon	Xylodon_detriticus_SH1517821.08FU
August	0.005	0dbe15075cc0676ec3a25785820d75ef688aaeb5	Polyporales	Xenasmataceae	Cabalodontia	NA
August	0.005	0ecbb81e6354ab0a8af1d3e9fad30bcf5f56242c	Polyporales	Meruliaceae	Ceraceomyces	Ceraceomyces_serpens_SH1651100.08FU
August	0.01	1038206b11755af0f5f30f674517a1e311ee908b	Cantharellales	Ceratobasidiaceae	NA	NA
August	0.005	10cccadfab1322335823ee2926d4c9c87a9da898	Polyporales	Hyphodermataceae	Hyphoderma	Hyphoderma_setigerum_SH1540206.08FU
August	0.005	1122ad92067a905e15f07f868b0243d357a6cd99	Agaricales	Tricholomataceae	Mycena	Mycena_sanguinolenta_SH1542298.08FU
August	0.005	121749faa7ab09fcb9079398701b511cd6906cd7	Polyporales	Polyporaceae	Datronia	Datronia_mollis_SH1520110.08FU
August	0.01	125006eeeaa5114a6107acb0e9037111aaf5eadb	Agaricales	Porotheleaceae	Porotheleum	Porotheleum_fimbriatum_SH1570116.08FU
August	0.005	1356c5c62b455300bdeaf67fa00a9311e44a754b	Pleosporales	Phaeosphaeriaceae	NA	NA
August	0.01	14778fb211cd8f5d8a7a3ba33b200223c0a2dacf	Hymenochaetales	Hymenochaetaceae	Fomitiporia	Fomitiporia_punctata_SH1566974.08FU
August	0.03	15a5463f1485cdfb25f3acb892cb6e9a20f82cb0	Capnodiales	Mycosphaerellaceae	Ramularia	Ramularia_rhabdospora_SH1577535.08FU
August	0.005	15b2991f8596f2f259f0da44346b892ba5653f8a	Cystofilobasidiales	Mrakiaceae	Itersonilia	Itersonilia_perplexans_SH1556067.08FU
August	0.035	164144ee12ab79eed6ed1e40575d57405f19692e	Agaricales	Inocybaceae	Inocybe	Inocybe_glabripes_SH1527480.08FU
August	0.005	1713abdace246ac5773d38c6959fa719bb20eb96	Polyporales	Coriolaceae	Trametes	Trametes_hirsuta_SH1565940.08FU
August	0.01	171e09d8cebbeb127a818ef7d2bf3eb1a8787536	Hymenochaetales	Schizoporaceae	Hyphodontia	Hyphodontia_pallidula_SH1644231.08FU
August	0.01	17d2d4a174422dca4eda5354f4a3738f075467a3	Russulales	Stereaceae	Stereum	Stereum_subtomentosum_SH1575993.08FU
August	0.005	18f22c17046017afcd8852411f26ee274bd1a394	Cantharellales	Ceratobasidiaceae	Ceratobasidium	NA
August	0.01	19618d35988f40d048567f09ac012f3808049d82	Boletales	Coniophoraceae	Coniophora	Coniophora_olivacea_SH1505673.08FU
August	0.005	1967fd6d9563a050b9178f41a7e10df57d07a235	Cantharellales	Ceratobasidiaceae	NA	NA
August	0.005	1ae272dbfdb1f9482cfcc3e0c03cb7f82e1fba0f	Hymenochaetales	Schizoporaceae	Alutaceodontia	Alutaceodontia_alutacea_SH1651040.08FU
August	0.005	1b922ffc5cb8cc8f9a3af0be0c99c4ffcff472cb	Trechisporales	Hydnodontaceae	Brevicellicium	Brevicellicium_olivascens_SH1557101.08FU
August	0.01	1bd99eaaff59b989d646d18f0fa93d4969b18746	Agaricales	Bolbitiaceae	Conocybe	Conocybe_mesospora_SH1552096.08FU
August	0.005	1be0a72359380a364d96d70ee58c7761af71b240	Helotiales	Helotiaceae	Crocicreas	Crocicreas_cyathoideum_SH1543032.08FU
August	0.005	1c8aecd05b88ac9baeea687f965d1145d0c2a80f	Russulales	Stereaceae	Stereum	Stereum_gausapatum_SH1576006.08FU
August	0.02	1c8b5dd8363103fffe27c98ad80058188c0f85b1	Cantharellales	Cantharellales_fam_Incertae_sedis	Sistotrema	Sistotrema_raduloides_SH1519451.08FU
August	0.005	1ce9e286089ec1d3e8faa7e67c055ad014d5f4a8	Cantharellales	Ceratobasidiaceae	Ceratobasidium	NA
August	0.025	1f000dce9224a00c6eca3ce0452bdbadd59b9ee8	Agaricales	NA	NA	NA
August	0.005	1f78c404e85867151c9c712e8deac2d0acbfac3c	Hymenochaetales	Schizoporaceae	Hyphodontia	Hyphodontia_abieticola_SH1647235.08FU
August	0.01	1f8590aa9359be10ff4d6d7d3eb9cf964fca661f	Cantharellales	Clavulinaceae	Clavulina	NA
August	0.005	23d0e0625316271ce6e0ed3e3487e5a79c6cd343	Russulales	Russulaceae	Russula	Russula_heterophylla_SH1633421.08FU
August	0.005	25c48bc1407f438dca9a9851c3feb377878fe2c7	Gloeophyllales	Gloeophyllaceae	Neolentinus	Neolentinus_lepideus_SH1142660.08FU
August	0.005	25f612131b178e3e0bc6ad4c1e0d10862ec036c3	Trechisporales	Hydnodontaceae	Trechispora	Trechispora_cohaerens_SH1557424.08FU
August	0.015	26445d87f138cd3e8bbf7f780610c3ab73f5e739	Agaricales	Bolbitiaceae	Conocybe	Conocybe_velutipes_SH1552064.08FU
August	0.005	26e28daa80c9a6281f87e3da721dbdb41f25aea8	Hymenochaetales	Hymenochaetaceae	Phellinus	Phellinus_igniarius_SH1639853.08FU
August	0.005	2767759c46036901887639c711c41dcf059b38e6	Polyporales	NA	NA	NA
August	0.005	277c218d2e273a8478e4804c5327403d8ed32bd4	Polyporales	Steccherinaceae	Steccherinum	Steccherinum_fimbriatum_SH1600331.08FU
August	0.04	27b15cf630de781bbdbcde192de1445f7324bf5d	Agaricales	Crepidotaceae	Crepidotus	Crepidotus_inhonestus_SH1565195.08FU
August	0.005	297b93aae1d91f562137cc6f0ad5d551c9859f41	Trechisporales	Hydnodontaceae	Trechispora	Trechispora_stellulata_SH1515824.08FU
August	0.01	2a9d74eb62e1ce43c8ebfa6e43cdd6cb026a6c9c	Auriculariales	Exidiaceae	NA	NA
August	0.05	2bd595707b2563378db65ef5d47df0ac47d32b05	Agaricales	NA	NA	NA
August	0.01	2c1596d03739a90bb07f436e324cc861784c7aeb	Hymenochaetales	Schizoporaceae	Hyphodontia	Hyphodontia_curvispora_SH1239624.08FU
August	0.005	2d00f2f5b72fbc71caf136c6ebebf90a2302edf1	Boletales	Boletales_fam_Incertae_sedis	Chalciporus	Chalciporus_piperatus_SH1569521.08FU
August	0.005	2d4a931113750422f9e5147346e92d2e3df3f33b	Cantharellales	Ceratobasidiaceae	NA	NA
August	0.005	2db824915f00e955c48af31cba4ba9c8e2ff5cae	Atheliales	Atheliaceae	Athelia	NA
August	0.005	2e762ffbfbad30c70a91004affecbd58d5cf989f	Russulales	NA	NA	NA
August	0.005	313406148a358e4d3a833bd7a871755acbb909b1	Agaricales	NA	NA	NA
August	0.035	32130e4ddad1a2a3fcd231b7672696d797c16abe	Hymenochaetales	Hymenochaetales_fam_Incertae_sedis	Peniophorella	Peniophorella_guttulifera_SH1510278.08FU
August	0.01	32836ce3bf5d4d795294ef4d226746d621c193a9	Polyporales	NA	NA	NA
August	0.01	32b4a023f0e4cd08dcb7f8d3b32550cb47a151ba	Pucciniales	Coleosporiaceae	Coleosporium	Coleosporium_tussilaginis_SH1570826.08FU
August	0.03	33469f148ce4b997125dfc0a967ad36821fd532b	Xylariales	Xylariaceae	Hypoxylon	Hypoxylon_fuscum_SH1525022.08FU
August	0.005	33b399e7b75cd43716796d556e28cf806f68e43a	Russulales	Gloeocystidiellaceae	Gloeocystidiellum	Gloeocystidiellum_kenyense_SH1558795.08FU
August	0.005	33fac96335b0aa2a8bf222b57b8347d1329feab6	Hymenochaetales	Schizoporaceae	NA	NA
August	0.015	3527b7193d5f15cc1f57ba355e4db33743d21b85	Polyporales	Fomitopsidaceae	NA	NA
August	0.015	35c641aaca5f1a01046bf59f3a0bc3198988569f	Hymenochaetales	Schizoporaceae	Xylodon	Xylodon_raduloides_SH1517805.08FU
August	0.005	37e898e4dc0eee72893e27be7a17f97eb7156779	Polyporales	Meruliaceae	Scopuloides	Scopuloides_hydnoides_SH1544535.08FU
August	0.035	37f8ae126e7db506cfd0293202b9bacdb43eb76c	Helotiales	Helotiales_fam_Incertae_sedis	Chalara	Chalara_holubovae_SH1522485.08FU
August	0.01	3968797a2e4c8194a87a16f804253f2d70e795c9	Hymenochaetales	Hymenochaetales_fam_Incertae_sedis	Peniophorella	Peniophorella_pallida_SH1563454.08FU
August	0.005	39891b00ea8e42a7ef70008282624ae4ea67b371	Corticiales	Corticiaceae	NA	NA
August	0.03	39b121d8e9198661fe66dca50602218603d62721	Agaricales	Inocybaceae	Inocybe	Inocybe_suecica_SH1574539.08FU
August	0.005	39dea5668a3a1bb71c5512ee8cbf689f77eeef4b	Agaricales	Strophariaceae	Kuehneromyces	Kuehneromyces_mutabilis_SH1563804.08FU
August	0.025	3ac67c25766135e9f7ec53ba8a596683af0c9437	Chaetothyriales	NA	NA	NA
August	0.005	3af6aec8a1fde30aca41240b8b5284a4524e3c7c	Agaricales	Bolbitiaceae	Conocybe	Conocybe_monikae_SH1177144.08FU
August	0.005	3b5da3d003b13dfc920fa5d62044223a86b4cbf7	Polyporales	Meruliaceae	Gloeoporus	Gloeoporus_taxicola_SH1510715.08FU
August	0.025	3ce3d36d689b6101211c9e5d16d0a15ced29053a	Polyporales	Polyporaceae	NA	NA
August	0.01	3d166024d6c49ad602ded4bea508536436968578	Cantharellales	NA	NA	NA
August	0.005	3d4c5042f4c7296afbd981dec71e2d87ee8ad5c6	Polyporales	Fomitopsidaceae	Antrodia	Antrodia_xantha_SH1521216.08FU
August	0.015	4044396ae834e1d41456835f1e27f2f9a097b7de	Agaricales	Crepidotaceae	Crepidotus	Crepidotus_mollis_SH1565193.08FU
August	0.005	4183eb830e6a0f7d3082d4703f70a677665d9d76	Cantharellales	Cantharellales_fam_Incertae_sedis	Sistotrema	NA
August	0.005	429d8ed883e22935e4d87c2e8af5e3f6d275c454	Agaricales	Psathyrellaceae	Coprinellus	NA
August	0.025	434c859e6da712dc371cd1ad102b15c7154d0184	Cantharellales	Botryobasidiaceae	Botryobasidium	Botryobasidium_laeve_SH1646389.08FU
August	0.01	44d6c8cd0b048ed7dd37165095dd637c44f25acc	Agaricales	Crepidotaceae	Crepidotus	Crepidotus_cesatii_SH1565196.08FU
August	0.005	457cb495e304fc43e1bf6c41d2d8005c16cec6f0	Polyporales	Meruliaceae	Phanerochaete	Phanerochaete_tuberculata_SH1563057.08FU
August	0.01	462370565dc21e7c3a46ca77312ee31d990217ca	Hymenochaetales	Schizoporaceae	Xylodon	Xylodon_rimosissimus_SH1517809.08FU
August	0.015	4684e2416d7d856e7eb0141991889455f45a08c8	Hymenochaetales	Tubulicrinaceae	Tubulicrinis	Tubulicrinis_subulatus_SH1562793.08FU
August	0.005	4704cdf392ddbcbfd26c7880a0918f456f2e0eab	Sporidiobolales	Sporidiobolaceae	NA	NA
August	0.025	484afd27a24cdee1532794c529a372544d41bd16	Russulales	Lachnocladiaceae	Vararia	Vararia_investiens_SH1181884.08FU
August	0.02	4a1a24111c182977484cc99b83eeda0ebeabadbb	Cantharellales	Clavulinaceae	NA	NA
August	0.005	4a859901782ad891aa4e7bb3bf62a82869f13fc6	Agaricales	Tricholomataceae	Baeospora	Baeospora_myosura_SH1781120.08FU
August	0.02	4aa706887dd7d02d2b65d2f97bc854bcf49e1522	Xylariales	Xylariaceae	Nemania	NA
August	0.005	4acdbf6033af7de2a72fda382086897df50ef9a4	Polyporales	Hyphodermataceae	Hyphoderma	NA
August	0.005	4b679fd3d7ba07fd26094a4be6db61d57a628c57	Russulales	Bondarzewiaceae	Heterobasidion	Heterobasidion_occidentale_SH1565348.08FU
August	0.035	4bfd536743b123fba98e1fd62effdd6f90c0e708	Polyporales	Steccherinaceae	Junghuhnia	Junghuhnia_collabens_SH1553177.08FU
August	0.005	4cf85d4e36d822f2e48073aaabe3a1d8f66a0f37	Helotiales	NA	NA	NA
August	0.01	4d0d46d27b5e496e3533e6c5cfd10104ff619d74	Polyporales	Steccherinaceae	Steccherinum	Steccherinum_ochraceum_SH1553181.08FU
August	0.02	4d170185118468bc8b7d81b49d379537ea85bd1c	Cantharellales	Cantharellales_fam_Incertae_sedis	Sistotrema	NA
August	0.025	4e59356b9560a2575e0e29f23ef7b8ba6753b9d1	Atheliales	NA	NA	NA
August	0.005	4e77a39cfc8242ab8149308382d94169597ecde9	Hymenochaetales	Hymenochaetaceae	Phellinus	Phellinus_laevigatus_SH1639852.08FU
August	0.045	4f1c9c6171cbf4ce98d323190ef6ae881ea89f95	Helotiales	Sclerotiniaceae	Pycnopeziza	Pycnopeziza_sympodialis_SH1518609.08FU
August	0.01	4f20f33be20cbadc5777d77791a538f37b1acc25	Polyporales	Meruliaceae	Ceriporia	Ceriporia_purpurea_SH1556931.08FU
August	0.035	4f6d966bf372ec8553125311591420716c8d64e9	Capnodiales	Cladosporiaceae	Cladosporium	Cladosporium_delicatulum_SH2320203.08FU
August	0.005	501227f1f012517b0ba74ada0e6ef877cc11e3a7	Hymenochaetales	Hymenochaetaceae	Phellopilus	Phellopilus_nigrolimitatus_SH1540507.08FU
August	0.005	503dfad3a04a337ccc37629e64b063c3b16517e8	Agaricales	NA	NA	NA
August	0.005	50e1eb37e3da9735a6e0fb1ada3bbda48a422f26	Hymenochaetales	Hymenochaetaceae	Hymenochaete	Hymenochaete_fuliginosa_SH1600739.08FU
August	0.025	511ff3c9843f7be17ecb724153b263f24e129478	Polyporales	NA	NA	NA
August	0.005	5289780ef127bbcdb3185f924cdf0ae82edcfbd8	Polyporales	Meruliaceae	Ceriporia	Ceriporia_reticulata_SH1556942.08FU
August	0.005	539ccbf463ccd33468a90a571b7d1fc6f5dc6070	Polyporales	Fomitopsidaceae	Daedalea	Daedalea_quercina_SH1519484.08FU
August	0.005	54af28c677754dfd6d759fa05b498b989df9fa2e	Cantharellales	Cantharellales_fam_Incertae_sedis	Sistotrema	NA
August	0.05	54bb83844168ce94179ba220366260889718a52b	Tremellales	Tremellaceae	Bulleromyces	Bulleromyces_albus_SH1574527.08FU
August	0.005	55d0f18e6ae9ef24dc69f6167fdc851855577eb5	Trechisporales	Hydnodontaceae	Trechispora	Trechispora_hymenocystis_SH1546198.08FU
August	0.005	56b549ccf5d319d11351690cf403b6f399349020	Hymenochaetales	Hymenochaetaceae	Fuscoporia	Fuscoporia_ferruginosa_SH1554183.08FU
August	0.01	56d403513040c08e3f8bedcbcdb1da84f2d4ae76	Agaricales	Inocybaceae	Inocybe	Inocybe_langei_SH1553764.08FU
August	0.005	56e6f29e0dd0c0c26a3ef4b296cfdc497c7a7ee1	Hymenochaetales	Hymenochaetales_fam_Incertae_sedis	Resinicium	Resinicium_furfuraceum_SH1553433.08FU
August	0.005	589378f88adb03122b2c64c32bccf2faf18cab1a	Helotiales	Dermateaceae	Mollisia	NA
August	0.005	58fd49b12fd99002ff26cea93ed63b3e727e6467	Polyporales	Meruliaceae	Ceriporia	Ceriporia_viridans_SH1510720.08FU
August	0.005	5b20368ba4caafb73e5ce10b6888e6bbb8ea5205	Sporidiobolales	Sporidiobolaceae	Rhodotorula	NA
August	0.045	5c02f48fec9f295204504e3c719c9e9fa580c215	Agaricales	Tricholomataceae	Mycena	Mycena_flavoalba_SH1511313.08FU
August	0.005	5ea69e0b5d4a2312311ecf541f51bd5c50762d24	Amylocorticiales	Amylocorticiaceae	Amyloxenasma	Amyloxenasma_allantosporum_SH1510053.08FU
August	0.01	5f447a5815f76f12784eff76369a571e72e40106	Hymenochaetales	Tubulicrinaceae	Tubulicrinis	Tubulicrinis_borealis_SH1185969.08FU
August	0.02	5ff94b30b7c70a393d71a379a591511e5311c2b8	Polyporales	Polyporaceae	Polyporus	Polyporus_tubaeformis_SH1520935.08FU
August	0.005	604c215c3c54fb973d4d688ebffbbebb7cc68848	Hymenochaetales	Schizoporaceae	Hyphodontia	Hyphodontia_subalutacea_SH1562808.08FU
August	0.005	60a2fbf9718c9d9722901d9ec6372471773d6652	Polyporales	Meruliaceae	Phanerochaete	Phanerochaete_laevis_SH1573652.08FU
August	0.02	6121b2b15e49a76053cbb489c38d93f4ad6aed4b	Agaricales	Bolbitiaceae	Conocybe	Conocybe_pilosella_SH1556438.08FU
August	0.005	617d2f91751b271eb1384a8dc5cae6b56cdefc6b	Polyporales	Fomitopsidaceae	NA	NA
August	0.01	61beb4fd9faa15c57ba32365bc67d27f479fa850	Polyporales	Hyphodermataceae	Hyphoderma	Hyphoderma_transiens_SH1611618.08FU
August	0.005	628df2cf8c83c7dae82efa66c900e9662b31746d	Trechisporales	Hydnodontaceae	Trechispora	NA
August	0.035	62d27527f235f7f016f84ac3300932737a5b92d1	Auriculariales	NA	NA	NA
August	0.005	63e6fcbe613a53ac3b16d27b507fc6cfc9d8729d	Russulales	Peniophoraceae	Peniophora	Peniophora_nuda_SH1646404.08FU
August	0.005	65c7bee6f1e8880a3e9f61ef1b7540a12515c129	Agaricales	Entolomataceae	Entoloma	Entoloma_sericeum_SH1569065.08FU
August	0.01	65e1fbad5f601b6dbcfb5e10c7db3a0fbaad1277	Polyporales	Hyphodermataceae	Hyphoderma	Hyphoderma_definitum_SH1648273.08FU
August	0.005	664b0bcdaa1fa8a74b982cf810d2c6b8ec625242	Polyporales	NA	NA	NA
August	0.025	66d70f5d2163bb484b186f7e31af21353e9000f4	Corticiales	Corticiaceae	NA	NA
August	0.005	678c0b82862dbd46434c8dd2936725c1cbb06499	Polyporales	NA	NA	NA
August	0.005	69bfdac995dc3362b881517ba81c460030339796	Polyporales	NA	NA	NA
August	0.025	6af8603bf6d68efe4ec82c69875efc4c00f317f6	Trechisporales	Hydnodontaceae	Trechispora	Trechispora_microspora_SH1557431.08FU
August	0.005	6ba192c50208ac18a33e302ffb241f463b1cd26d	Trechisporales	Hydnodontaceae	Trechispora	Trechispora_subsphaerospora_SH1180893.08FU
August	0.005	6bff573a1c5531eeaf76fed7ec2d5861045ea926	Polyporales	Meruliaceae	Phanerochaete	NA
August	0.01	6c40751e4606a21cc4a86f4d1ae3039c65c06c9d	Polyporales	Fomitopsidaceae	Antrodia	Antrodia_serialis_SH1879451.08FU
August	0.01	6c49206542c6e9d35261b15cde40232e25067d3f	Hymenochaetales	Hymenochaetaceae	Phellinus	Phellinus_tremulae_SH1639854.08FU
August	0.02	6c6b4954dd92967c8f87fb895ad81e46ef24c7dc	Exobasidiales	Exobasidiaceae	Exobasidium	Exobasidium_vaccinii_SH1514431.08FU
August	0.005	6da04e9ef16b2a3248bacac6658860e7f800cec7	Polyporales	Polyporaceae	Rhodonia	Rhodonia_placenta_SH1521217.08FU
August	0.005	6dd2e275c78dcf3a6564f568d131e20d8f1696a0	Hymenochaetales	Hymenochaetales_fam_Incertae_sedis	Trichaptum	Trichaptum_abietinum_SH1539679.08FU
August	0.005	6fe2cb05a632d8e23722ddc5ff89373485e719f7	Tremellales	Bulleribasidiaceae	Dioszegia	Dioszegia_fristingensis_SH1609776.08FU
August	0.005	7029875951737a9c823be7616e91a959ad30eb32	Agaricales	NA	NA	NA
August	0.005	7059ff4a339fbfe01b2eb985143adcbd39877a9c	Diaporthales	Valsaceae	NA	NA
August	0.005	710e4263554cab0146cf11c4ba118f03533d1e31	Corticiales	Corticiaceae	NA	NA
August	0.005	72017f15fe3b43487bc7f58cbf0a33fdd46a641b	Polyporales	Meruliaceae	Mycoacia	Mycoacia_uda_SH1561393.08FU
August	0.045	735c168c37f783c36032e291acc8de89bff69a9d	Capnodiales	Teratosphaeriaceae	Bryochiton	Bryochiton_monascus_SH1521416.08FU
August	0.005	73b79fe78b79832f9ad2ae0cc89789559ae915aa	Agaricales	NA	NA	NA
August	0.005	74a31315ce8c5edebc426cb35a6c01790a872c17	Sebacinales	Sebacinaceae	Chaetospermum	NA
August	0.005	74c7341ed7474d7c000bbdd789e51a60c9812444	Sporidiobolales	Sporidiobolaceae	Rhodotorula	NA
August	0.015	76d7968d583eaf2f3c203d48769532fa6a35a040	Atheliales	Atheliaceae	Leptosporomyces	Leptosporomyces_galzinii_SH1615992.08FU
August	0.005	7782b362ef1c8770cf5a5f3e059e656a586ae8c2	Helotiales	NA	NA	NA
August	0.045	77bd58acd0d22f6d75991d9ecf127e98efe408ef	Agaricales	Tricholomataceae	NA	NA
August	0.005	783c271a2cd900bc84f7b15da868f480065d9093	Polyporales	Fomitopsidaceae	Antrodia	Antrodia_xantha_SH1521219.08FU
August	0.03	786a152d24a4b79aea444120e8fa71b9a2442f55	Sporidiobolales	Sporidiobolaceae	Rhodotorula	NA
August	0.005	7a3eef6a84a12f512340c9382815c478505757ad	Platygloeales	Platygloeaceae	Insolibasidium	Insolibasidium_deformans_SH1245311.08FU
August	0.005	7a60860ecc5866c506d2c680d5e58c7d12ef1c97	Hypocreales	Clavicipitaceae	Claviceps	NA
August	0.005	7a9e69bb63026ec9b064af235114bb8482900537	Hymenochaetales	Schizoporaceae	Alutaceodontia	Alutaceodontia_alutacea_SH1651040.08FU
August	0.005	7aa3a27e3bf5916a40b4738d16a5b5b5721fb652	Hymenochaetales	Hymenochaetaceae	Inocutis	Inocutis_rheades_SH1543689.08FU
August	0.025	7b71d0e3e930df62da6cb04691fdf9068062e8c9	Pleosporales	Lophiostomataceae	Sigarispora	Sigarispora_arundinis_SH1556698.08FU
August	0.005	7f9dd8765ac373575437e01cf85c0a240912ebfb	Russulales	NA	NA	NA
August	0.005	80c10141b4e423e1536271f0264a72d40ac0ca45	Trechisporales	Hydnodontaceae	Trechispora	NA
August	0.005	81a48ac15fa8e4f08d99648224dca8c980d80923	Cantharellales	Cantharellales_fam_Incertae_sedis	Burgoa	NA
August	0.005	81d4e3c2c027ef8cb3e935b4e9ffb7663d81d9b1	Pezizales	Sarcosomataceae	Plectania	Plectania_melastoma_SH1518922.08FU
August	0.005	81e1533221897d1b39b4eac0613120d6ed5c563f	Polyporales	Meruliaceae	Phanerochaete	Phanerochaete_bambusicola_SH1573675.08FU
August	0.005	81eb7d5e953b65b547e1688bfd7874f8f245e087	Polyporales	Meruliaceae	Mycoacia	Mycoacia_fuscoatra_SH1599720.08FU
August	0.015	82675b13a862c67b5fa1a0b0dd6f4e617025968e	Saccharomycetales	Saccharomycetaceae	Kluyveromyces	Kluyveromyces_hubeiensis_SH1520369.08FU
August	0.03	8275dad48f01df11bd81431db65f3f5349f52d8c	Hypocreales	Nectriaceae	NA	NA
August	0.005	8468ff24a33f94cbaf21bec45e0ad513d98d446e	Agaricales	Pluteaceae	Pluteus	Pluteus_cervinus_SH1604545.08FU
August	0.01	85f7235c0fb8f879271380bed78eb201b15c8e60	Trechisporales	Trechisporales_fam_Incertae_sedis	Sistotremastrum	Sistotremastrum_guttuliferum_SH1545015.08FU
August	0.005	8619f383c3a0fd77872f60081cb36b1424215b56	Hymenochaetales	Hymenochaetaceae	Hymenochaetopsis	Hymenochaetopsis_tabacina_SH1554269.08FU
August	0.005	86e2317692da36e1c702bcb43bb01504b3cb47ef	Polyporales	Polyporaceae	Lentinus	Lentinus_sajor-caju_SH1551179.08FU
August	0.02	8807149745423a24bc141eff572b657b0386f69d	Agaricales	Psathyrellaceae	Coprinopsis	Coprinopsis_cinerea_SH1237436.08FU
August	0.005	89c61c171b6982b5026e709c6f2119a2f5b332fd	Boletales	Paxillaceae	Paxillus	Paxillus_involutus_SH1569017.08FU
August	0.005	8a077c5b25cd5c36fd4a14f02b3733ce5a2db694	Agaricales	Tricholomataceae	Tricholoma	Tricholoma_inocybeoides_SH1647742.08FU
August	0.01	8a925f38c4295d5c788cdcf01d1581126c3d1358	Helotiales	Dermateaceae	Oculimacula	Oculimacula_yallundae_SH1545871.08FU
August	0.005	8ab1963aa81fcbab351b7cec79bd95688be5bd73	Russulales	Bondarzewiaceae	Heterobasidion	Heterobasidion_orientale_SH1565350.08FU
August	0.005	8b5913b56fc2186a92c6cd7bafe4cd6a6c6a37bc	Atheliales	Atheliaceae	NA	NA
August	0.005	8b7bf8f30324c19321d7437548ddb17d45629710	Polyporales	Steccherinaceae	NA	NA
August	0.01	8c66dc20a9d877a05a05a6df9dcbc84b77a740b1	Cantharellales	NA	NA	NA
August	0.04	8cbf3c8d2e8db95f6eed808ddca2d3ace998bba6	Cantharellales	Ceratobasidiaceae	Ceratobasidium	NA
August	0.04	8ddc371333d19faba05533afc631f789171aeaad	Agaricales	Psathyrellaceae	Coprinellus	Coprinellus_velatopruinatus_SH1513429.08FU
August	0.05	8ea9fb7627286c38e38676fe06eb088bc34b4286	Diaporthales	NA	NA	NA
August	0.005	8ee9064f1d7dd7559a7f90c8e3d52944bb6fc443	Russulales	Peniophoraceae	Peniophora	NA
August	0.005	90b0450293469780c5d47be6ebb62a8d808adfcc	Agaricales	Tricholomataceae	Leucopaxillus	Leucopaxillus_giganteus_SH1612102.08FU
August	0.025	91d6ea6cb54abd93ce1fda3f7f10d0f173bfe867	Agaricales	Psathyrellaceae	NA	NA
August	0.02	922ce727e9cfe2ebbcd6c31ab9caf0f1a64cad2c	Helotiales	NA	NA	NA
August	0.005	92f77c57aae52139f5b031a2451976b64d43e1ff	Hymenochaetales	Tubulicrinaceae	Tubulicrinis	NA
August	0.005	939df8c0ab7f1cb09d6caa808ac59d1f6837b935	Sporidiobolales	Sporidiobolaceae	Rhodotorula	NA
August	0.035	94d965f1f5dbdf7e56e8962fbbddd36d6dd30628	Agaricales	Tricholomataceae	Mycena	Mycena_renati_SH1542333.08FU
August	0.03	9549b768b10ff4c3c997e4ba3fe689e2531c4416	Agaricales	Lycoperdaceae	Bovista	Bovista_promontorii_SH1556532.08FU
August	0.005	9549e8be618c1a421ec316cb1decc96f22672ce9	Polyporales	Fomitopsidaceae	NA	NA
August	0.005	957e6f2f2b308ebb6ad33453c2f7444e7738e6c7	Entylomatales	NA	NA	NA
August	0.01	960b01f7d337f43ee6a52759728205ffcd532f92	Russulales	Stereaceae	Stereum	Stereum_hirsutum_SH1575988.08FU
August	0.005	965f624a4e96f8d718866361f94fad17cc83e839	Agaricales	Schizophyllaceae	Schizophyllum	Schizophyllum_commune_SH1565278.08FU
August	0.005	97466ba436d9dd234dfedfe1f166281d807db361	Hymenochaetales	Schizoporaceae	Oxyporus	Oxyporus_corticola_SH1600081.08FU
August	0.01	978d0df05ff1a77b80dedd631487718d1f8f0e0a	Agaricales	Strophariaceae	Psilocybe	Psilocybe_inquilina_SH1516049.08FU
August	0.005	995cd8e0fa3a1bb227c3362c0cc0e070d29ed469	Agaricales	NA	NA	NA
August	0.005	9962591483a21bbe84f47908ccf8c6324a0589e8	Trechisporales	Trechisporales_fam_Incertae_sedis	Sistotremastrum	Sistotremastrum_suecicum_SH1565626.08FU
August	0.015	9994fb9d7924319373bede62459b1a41363389a7	Trechisporales	Trechisporales_fam_Incertae_sedis	Sistotremastrum	NA
August	0.005	9ab7d24f805efd5379ae192d8349055c01a74f53	Polyporales	Meruliaceae	Ceriporia	Ceriporia_viridans_SH1510723.08FU
August	0.005	9b49c77e034027fbdc8d04f54376df8071ae53d3	Russulales	Lachnocladiaceae	Scytinostroma	Scytinostroma_portentosum_SH1509850.08FU
August	0.045	9bfdb0c9a6727a7e5cd95dc32eadb76e25645f86	Agaricales	Psathyrellaceae	Coprinopsis	Coprinopsis_urticicola_SH1566162.08FU
August	0.03	9c1a538dfe8256c158e399c52fbb5159fdd03d7a	Cystofilobasidiales	Mrakiaceae	Itersonilia	Itersonilia_perplexans_SH1556067.08FU
August	0.02	9d2b60cc0dceebb20b643c0cabc0ea55153ab599	Cantharellales	Clavulinaceae	Clavulina	NA
August	0.005	9d5b5d550be1e3ffee60d77fa031ce388b68d5aa	Sporidiobolales	Sporidiobolaceae	Sporobolomyces	Sporobolomyces_phaffii_SH1970376.08FU
August	0.005	9e966e9fb79309343e338353b64b0d685f110f70	Helotiales	Hyaloscyphaceae	Hyaloscypha	Hyaloscypha_intacta_SH1523801.08FU
August	0.005	9f3b5ebbd94f5a26306c1d4b24fd677e2ebe4737	Pleosporales	Didymellaceae	Neoascochyta	Neoascochyta_exitialis_SH1547066.08FU
August	0.005	9f5844c366f5c8d9dd082e215a1515f9f5f04805	Agaricales	Omphalotaceae	Gymnopus	Gymnopus_androsaceus_SH1512129.08FU
August	0.04	9f5d1071581d8f17fe3aba4d462b70963fdbe813	Cantharellales	Ceratobasidiaceae	NA	NA
August	0.005	9f9bcab405b2bf68dc9abecf958bd02a999d0db3	Agaricales	Agaricaceae	Coprinus	Coprinus_phaeopunctatus_SH1566184.08FU
August	0.005	a0a08217b024c273d202516424871ab8cc7fc00f	Hymenochaetales	Hymenochaetaceae	Phellinus	Phellinus_viticola_SH1554178.08FU
August	0.005	a0b6992f5e4c6c77b4315febb9459a3dd9f4b2ed	Agaricales	Pterulaceae	Aphanobasidium	Aphanobasidium_pseudotsugae_SH1601188.08FU
August	0.015	a0dd2218d638c2dabd3e5e3d81e6cd5ad02a4ee2	Cantharellales	Ceratobasidiaceae	Rhizoctonia	NA
August	0.035	a1945b9fca4b06006da46f51dd763dfc513bf5a2	Hymenochaetales	Hymenochaetales_fam_Incertae_sedis	Resinicium	Resinicium_bicolor_SH1509369.08FU
August	0.02	a2a9dcb907c2757401a6e86ce5ddf3e998ff4cd5	Hymenochaetales	Tubulicrinaceae	Tubulicrinis	NA
August	0.005	a2b5e786ec03992cd5bc64399daf0dfeaf13b788	Agaricales	Typhulaceae	Typhula	Typhula_lutescens_SH1246925.08FU
August	0.005	a2d3e0c72153dfe6bd56fa57c9646429e1f1d39d	Polyporales	Fomitopsidaceae	NA	NA
August	0.005	a452819a80b7e1ab4a6a2497301bdb4e9556f416	Atheliales	Atheliaceae	Athelia	NA
August	0.005	a4f8f634540b53e24fc7593dbc5037ca41bb8c72	Trechisporales	Hydnodontaceae	Trechispora	NA
August	0.005	a6b07536daf5eda14b2a28a00701616ac8543abe	Agaricales	Marasmiaceae	Marasmius	Marasmius_oreades_SH1543540.08FU
August	0.005	a6c290e8f0832e1120acc6bb79114420438ee8fe	Trechisporales	NA	NA	NA
August	0.005	a6dfd869b7a7bdff903ca3d3d172e54dbc4255fe	Cantharellales	Botryobasidiaceae	Botryobasidium	Botryobasidium_intertextum_SH1711237.08FU
August	0.025	a7614f8fa01d5e2b22e6121ca34cf2ec36b9204e	Agaricales	Tricholomataceae	Mycena	Mycena_floridula_SH1527282.08FU
August	0.005	a7bc539d63d48c66ef6a9fe56a29ff70754d3868	Russulales	Peniophoraceae	Peniophora	NA
August	0.005	a8c58d53a9c42ddaf7b8744a4f77b57a8c3745a1	Entylomatales	NA	NA	NA
August	0.005	a9301ee71af3502b0115a4c387f80b82f83ef988	Polyporales	Meruliaceae	Phlebia	Phlebia_bresadolae_SH1510259.08FU
August	0.005	aa68d6b5970019ed51d1733e5f1bad7749cd7b6c	Agaricales	Tricholomataceae	Mycena	Mycena_urania_SH1542340.08FU
August	0.02	aacc53ccee13850c42ef6f13083451254b8fa716	Hymenochaetales	Hymenochaetaceae	Hymenochaete	Hymenochaete_cinnamomea_SH1600738.08FU
August	0.04	ab28a9823b2920533b020828bda91df77f69f8ea	Agaricales	Tricholomataceae	Arrhenia	Arrhenia_philonotis_SH1611761.08FU
August	0.005	ab6959a5664c7a906870e53049793ab589212aef	Hymenochaetales	Schizoporaceae	Hyphodontia	NA
August	0.005	accaa8e68e1782c78a142bd6048b51965a9299f3	Cantharellales	Ceratobasidiaceae	NA	NA
August	0.005	ad181d89a25b2e78d8dfe962937ca40089d8a26d	Helotiales	Helotiaceae	Meliniomyces	NA
August	0.01	af47fb65b734a5b3cb34df5ec3ff80e34bce4d12	Helotiales	Sclerotiniaceae	Pycnopeziza	Pycnopeziza_sympodialis_SH1518609.08FU
August	0.005	af8d4d5a2a49fe72d00751132354913b8ac4eb2f	Sporidiobolales	Sporidiobolaceae	Rhodotorula	NA
August	0.005	afe725b27de927e76925417f3fd9fdf62bbffef6	Cantharellales	Botryobasidiaceae	Botryobasidium	NA
August	0.025	afe966aa7c84505525dea9b929646c250a6750eb	Entylomatales	Entylomataceae	Entyloma	Entyloma_microsporum_SH1516869.08FU
August	0.025	b04d70e0abfca5c20a4372c4b1ac60e45ccd823f	Trechisporales	Hydnodontaceae	Trechispora	NA
August	0.035	b1520876029538288713637eff18092933a24c8c	Agaricales	Tricholomataceae	Mycena	NA
August	0.005	b16dd56bcf63f27bb06050f9ccc9c63e60d4de14	Cantharellales	Cantharellales_fam_Incertae_sedis	Sistotrema	Sistotrema_oblongisporum_SH1513285.08FU
August	0.02	b1b347e981eaa9f5d019791a7779f36317714b77	Polyporales	Meruliaceae	Hapalopilus	Hapalopilus_nidulans_SH1610950.08FU
August	0.005	b3a526b0e4dcbdca04fb9287ea9a781b3c016661	Agaricales	Agaricaceae	Agaricus	Agaricus_moelleroides_SH1772383.08FU
August	0.01	b4b505144fb08c8051c6d2111f80f52276d0fd6f	Trechisporales	NA	NA	NA
August	0.01	b54f6da562205e13a6c73cd64f6063cf3d558b49	Hymenochaetales	Tubulicrinaceae	Tubulicrinis	Tubulicrinis_angustus_SH1519461.08FU
August	0.045	b65801e0490d9ea9e2cf47330e5c1ed5d37d6248	Hymenochaetales	Schizoporaceae	Xylodon	Xylodon_ramicida_SH1678253.08FU
August	0.01	b6798d5a464aadb213f04a83bea92f1e38ef92ae	Agaricales	NA	NA	NA
August	0.015	b7a5213616e0854b67b00159a54f63db35538ee8	Helotiales	Hyaloscyphaceae	Lachnum	NA
August	0.005	b7edb89fa2290a946f6318995304798c5d239001	Cantharellales	Botryobasidiaceae	Botryobasidium	Botryobasidium_candicans_SH1510049.08FU
August	0.01	b8288633b3ede52985f195ed4cf1929b76b4a2eb	Atheliales	Atheliaceae	Athelopsis	Athelopsis_subinconspicua_SH1565268.08FU
August	0.005	b98a1c8a71332c1e9d247b8bd898fb55ed782a68	Entylomatales	Entylomatales_fam_Incertae_sedis	Tilletiopsis	Tilletiopsis_washingtonensis_SH1541583.08FU
August	0.005	bb087408156c15d577edeb5802c77f352d523dfc	Polyporales	Fomitopsidaceae	Skeletocutis	NA
August	0.005	bb7d382a944e2633760139cc35798c3a504d237a	Hymenochaetales	Schizoporaceae	Alutaceodontia	Alutaceodontia_alutacea_SH1651040.08FU
August	0.03	bc62754c165543fcb184f972c4b2e64a1eafa1ad	Atheliales	Atheliaceae	Athelia	Athelia_decipiens_SH1561283.08FU
August	0.005	bd72de32380f6120022a484ecfc3efca559fd1ec	Hymenochaetales	Schizoporaceae	Xylodon	NA
August	0.015	be412fe21357fc74d2ff5e3ab22de3119f746730	Agaricales	Agaricaceae	Lepiota	Lepiota_cristata_SH1554394.08FU
August	0.015	bf0e8e901ed739e9f4af4d33459f87978c8714d6	Microascales	Halosphaeriaceae	NA	NA
August	0.005	bfe682bb62da822d3633543b41e9cd3e0a1f7c5d	Helotiales	Dermateaceae	Oculimacula	Oculimacula_yallundae_SH1545871.08FU
August	0.005	c0087bbd327beb5ef309cee80628d032eaa320cc	Cantharellales	Cantharellales_fam_Incertae_sedis	Sistotrema	NA
August	0.03	c0356e739d8e92b306ee3744ecd3d3f2e8266cc6	Boletales	Hygrophoropsidaceae	Hygrophoropsis	Hygrophoropsis_aurantiaca_SH1556990.08FU
August	0.02	c2a2a8acdfa838892541139a8183fa254175942d	Polyporales	Meruliaceae	Ceraceomyces	NA
August	0.02	c2fcf5cc415e4b22e27f01c5385c5e667838ea7b	Agaricales	Strophariaceae	Deconica	Deconica_phyllogena_SH1516047.08FU
August	0.005	c3091f6e5fceab91fe6904698c8243fc3f077808	Polyporales	Meruliaceae	Phlebiopsis	Phlebiopsis_gigantea_SH1573645.08FU
August	0.005	c3459b2013f195bb500adf24352c1f3fa8c2cedd	Russulales	Auriscalpiaceae	Auriscalpium	Auriscalpium_vulgare_SH1565117.08FU
August	0.05	c371cb30cac117c16841203f344e393f0d46be31	Auriculariales	Exidiaceae	NA	NA
August	0.005	c3b0de03452e3b16b3610dbe43b850a9b74af072	Polyporales	NA	NA	NA
August	0.01	c8228d6d49dc9f9ae3dfe3edb1c1e04e43d9026f	Tremellales	Bulleribasidiaceae	Dioszegia	Dioszegia_hungarica_SH1609774.08FU
August	0.035	c832eea6fdc77b22b20a97bd41b0d43ac1931ed5	Cantharellales	Ceratobasidiaceae	Rhizoctonia	NA
August	0.005	c85fbb72c61ee3085f22dae009723ba6ee342b9c	Hymenochaetales	Hymenochaetaceae	NA	NA
August	0.035	ca09799e5b5b304e5adf42963e51b60c9ae131b8	Hymenochaetales	Hymenochaetales_fam_Incertae_sedis	Peniophorella	Peniophorella_praetermissa_SH1510269.08FU
August	0.005	ca607e79c26824d27e72fd27bcafe2117eb6c7df	Auriculariales	Exidiaceae	Basidiodendron	Basidiodendron_eyrei_SH1242691.08FU
August	0.03	cb3a2ceea1cd8d8503cc1281cb25127996576d34	Agaricales	NA	NA	NA
August	0.01	cbd16c33478e1edaaf061c0015d3aae76a34c3fe	Helotiales	Hyaloscyphaceae	Cistella	Cistella_acuum_SH1522491.08FU
August	0.005	cc1f9f3899665e988bfbc2122ffc6fcf87ca85f3	Hymenochaetales	Schizoporaceae	Xylodon	Xylodon_nespori_SH1517807.08FU
August	0.01	cc6ce3ab29fab8b0ba82488b8f1ff2e2a91824ad	Auriculariales	Hyaloriaceae	Stypella	Stypella_grilletii_SH1243813.08FU
August	0.005	cd76305c97880772a3acd5af7ab587f8cd44b14c	Polyporales	Steccherinaceae	Junghuhnia	Junghuhnia_luteoalba_SH1600330.08FU
August	0.005	cdd643eefd53679ff7d5ac73056fce37f97c0412	Erysiphales	Erysiphaceae	NA	NA
August	0.005	ce44e460d4f2a8687a075d8811afe58fe50cf290	Helotiales	NA	NA	NA
August	0.005	ce52dec516d144a5149365cc364f4617cd5971d7	Hymenochaetales	Schizoporaceae	Xylodon	Xylodon_crustosus_SH1511962.08FU
August	0.045	cec8483db47b93cf8d9a8b03a784979d374826b8	Hymenochaetales	Hymenochaetaceae	Fuscoporia	Fuscoporia_ferrea_SH1525640.08FU
August	0.02	d179990382a1300f27548588f2b623738839ed53	Hymenochaetales	Hymenochaetaceae	Phellinus	NA
August	0.005	d38a09bdad5619d08d28d0f89235d4b3f9c974be	Polyporales	Steccherinaceae	Ceriporiopsis	Ceriporiopsis_pseudogilvescens_SH1171806.08FU
August	0.01	d4d9a3ab09ae90372d382b8cbff3135714a62154	Thelephorales	Thelephoraceae	Tomentella	NA
August	0.005	d5b55991ea27f913e3d988c4a427f29747049543	Agaricales	Tricholomataceae	NA	NA
August	0.005	d5d58d2cf071bb4f01168220939262632eaeb7b1	Hymenochaetales	Schizoporaceae	Alutaceodontia	Alutaceodontia_alutacea_SH1651040.08FU
August	0.005	d5eb164329d6ff98e5d370d163f62ef3a81a257a	Agaricales	Marasmiaceae	Marasmius	Marasmius_rotula_SH1611518.08FU
August	0.005	d6db9b07682a7215f69924db6e4ac1cb8d807fb5	Polyporales	NA	NA	NA
August	0.025	d81ab05c1603012dfdef06a32502eb38d8d50387	Hymenochaetales	Hymenochaetales_fam_Incertae_sedis	Peniophorella	Peniophorella_praetermissa_SH1510276.08FU
August	0.015	daacd8a28c802389c1b2f189fc130f87d13326cb	Agaricales	Psathyrellaceae	Coprinopsis	Coprinopsis_pseudofriesii_SH1566183.08FU
August	0.005	dc8fc9087d5792d654d7b24ee48872f2ce506852	Helotiales	Dermateaceae	Pyrenopeziza	Pyrenopeziza_revincta_SH1505329.08FU
August	0.005	dd3839c8116b5fea3d31612eba9a3bfc23247ee0	Auriculariales	NA	NA	NA
August	0.015	e064da308a6c84a73c278cbb401c90329f95b428	Erysiphales	Erysiphaceae	Sawadaea	Sawadaea_bicornis_SH1528392.08FU
August	0.03	e0e74eab562d1d5f77b39c4afb5b349a4c0723d6	Hymenochaetales	Hymenochaetaceae	Phellinopsis	Phellinopsis_conchata_SH1556981.08FU
August	0.005	e384126e46274da3b525c2e799512d203a1e36a0	Polyporales	Steccherinaceae	Junghuhnia	Junghuhnia_nitida_SH1553175.08FU
August	0.005	e466719ef3c574a1d2150dc6b93c1cbe3a75e4b3	Hymenochaetales	Hymenochaetaceae	Phylloporia	Phylloporia_ribis_SH1213253.08FU
August	0.005	e6e3d822f9696aef2a66a380c956979eaf862cab	Russulales	Peniophoraceae	Peniophora	Peniophora_rufomarginata_SH1646426.08FU
August	0.005	e6ebdebceed6bba7713faf4c7c023cbf21cf7949	Eurotiales	Aspergillaceae	Penicillium	Penicillium_penicillioides_SH1528299.08FU
August	0.03	e74d1fca8700600d5d9596597451746cf1d470e0	Entylomatales	Entylomataceae	Entyloma	Entyloma_holwayi_SH1516872.08FU
August	0.005	e74d77a009f5880b886ff61020a1fa4a514caa80	Polyporales	Coriolaceae	Trametes	Trametes_gibbosa_SH1555636.08FU
August	0.03	e7a79732f5628ac1f203dacf38da27f260250f6b	Polyporales	Coriolaceae	Trametes	Trametes_versicolor_SH1565939.08FU
August	0.025	e7b4352ca0e9ef6aeba7931c593be77f7b3326e1	Polyporales	Polyporaceae	Datronia	Datronia_mollis_SH1520110.08FU
August	0.005	e829ecafd1ea8fb3ba225913f68ae8ca456be06b	Agaricales	Psathyrellaceae	Coprinellus	NA
August	0.005	e8b224e7f9ec892640b0a25b0954bccf2e8cb634	Helotiales	NA	NA	NA
August	0.005	eb106d2607d856c2c00a054eca4bac50b0efb4c7	Cantharellales	Cantharellales_fam_Incertae_sedis	Sistotrema	NA
August	0.005	edbee2522ba67b4092de023dd4d1b6c65e140e9a	Cantharellales	Cantharellales_fam_Incertae_sedis	Sistotrema	Sistotrema_oblongisporum_SH1512589.08FU
August	0.05	ee65613a980a5c1377644a9362dbc5233e09079c	Russulales	Russulales_fam_Incertae_sedis	Boidinia	Boidinia_furfuracea_SH1510290.08FU
August	0.005	f0a00aebe1052b3db759da947d57e559a8545a8c	Cantharellales	Clavulinaceae	Clavulina	NA
August	0.005	f0d2068fa93fc88b6b6868b32fb713265de30e8d	Pezizales	Pyronemataceae	NA	NA
August	0.005	f187776af614fe06e88ef1b20ba83a1dca8d7505	Agaricales	Psathyrellaceae	Coprinellus	Coprinellus_disseminatus_SH1508484.08FU
August	0.025	f1fe16d1db4341241a2b15df1174e9a3f9e17189	Exobasidiales	Exobasidiaceae	Exobasidium	NA
August	0.02	f201cb8e6f6510b00b842f89907247983364d544	Polyporales	Hyphodermataceae	Hyphoderma	Hyphoderma_nemorale_SH1155973.08FU
August	0.025	f2117456d8d15d3806c831dbb7d9f11a7670c0db	Chaetothyriales	NA	NA	NA
August	0.005	f285ce37dd6cb63e1db545dec826aa75ba916036	Polyporales	Meruliaceae	Ceriporia	Ceriporia_excelsa_SH1510726.08FU
August	0.005	f2f64a6140c12f1eda5703d3a08824356a35f6e9	Polyporales	NA	NA	NA
August	0.015	f3a727bdb7f9d5b9901c9f2c747c37527fd3fd5a	Pucciniales	Melampsoraceae	Melampsora	Melampsora_epitea_SH1572516.08FU
August	0.005	f3cd97534c6cec17457ba1d13b5e1d37cc4c9f70	Corticiales	Corticiaceae	NA	NA
August	0.035	f560318e957bdadd7fae178822dc7803058a3f43	Agaricales	Entolomataceae	Clitopilus	Clitopilus_hobsonii_SH1574436.08FU
August	0.005	f6b7264c0aecd75f96a22b325bb7d684820b0923	Polyporales	Fomitopsidaceae	Tyromyces	Tyromyces_chioneus_SH1551706.08FU
August	0.005	f75f6638681c717bad69122980d6c737f404473f	Hymenochaetales	Schizoporaceae	Xylodon	Xylodon_sambuci_SH1544161.08FU
August	0.015	f79e61aaa9b6ad911512073e408a35cdcf9548ef	Agaricales	NA	NA	NA
August	0.02	f9e08ad883595dba4b3ba3cc6bc9d126921f0f06	Hypocreales	Clavicipitaceae	Metarhizium	NA
August	0.005	fa552c3701b6d1a85b92fe666f31e93a6659f806	Hymenochaetales	Hymenochaetaceae	Inonotus	Inonotus_obliquus_SH1624673.08FU
August	0.04	fa6db36c53b60de5af98691b9982e2fc9171f228	Cantharellales	Ceratobasidiaceae	NA	NA
August	0.005	faa6b6fc0e45b3a7f741b354d8a27e1906c5bde1	Cystofilobasidiales	Mrakiaceae	Itersonilia	Itersonilia_pannonica_SH1556070.08FU
August	0.025	fb031a74fd70df105d1336c9fd60dcc6532c6453	Agaricales	Pterulaceae	Merulicium	NA
August	0.04	fb35bc316df5ae0042e82a7278ba4dfd202a387b	Chaetothyriales	Herpotrichiellaceae	NA	NA
August	0.005	fd97c7d32b960525b7c6cbda73121e171b69b857	Polyporales	Meruliaceae	Phlebia	Phlebia_lilascens_SH1241723.08FU
August	0.005	fdc1dd8b12dc32449804c6fb4253ac0253a9e1d0	Cantharellales	Cantharellales_fam_Incertae_sedis	Sistotrema	Sistotrema_diademiferum_SH1244890.08FU
August	0.015	fee8e38538cf02306342f7ef79003e4d70a24da3	Agaricales	Bolbitiaceae	Agrocybe	Agrocybe_pediades_SH1563794.08FU
April	0.005	0291fbcfe1b4a8fe2119e3da22377731a3a03bcf	Polyporales	Polyporaceae	Daedaleopsis	Daedaleopsis_sinensis_SH1190366.08FU
April	0.005	0fcd6789538c513a02265ec06ab4070ff061cfcf	Verrucariales	Verrucariaceae	Verrucaria	NA
April	0.01	1648035de50e92fdc248c34844be9f8300548f24	Helotiales	Helotiaceae	Tetracladium	NA
April	0.01	1bd284596952943fae963855002af7214e6dca3a	Helotiales	Helotiales_fam_Incertae_sedis	Cadophora	Cadophora_luteo-olivacea_SH1545862.08FU
April	0.05	289ab9686f8fecd13d0688b2ba3860bd9da6686e	Chaetothyriales	Herpotrichiellaceae	Exophiala	Exophiala_bonariae_SH1635801.08FU
April	0.01	6070a94be3fc0e72f3f3cb28c98a459a4bd5a3a1	Pleosporales	Periconiaceae	Periconia	Periconia_pseudodigitata_SH1573202.08FU
April	0.015	7074da5cfc1731284dcdc95db18e53441b6e3cc6	Sporidiobolales	Sporidiobolaceae	Rhodotorula	NA
April	0.015	71bc8ce149a76af483c03d29db8574f41ced9fa6	Helotiales	Sclerotiniaceae	Ciboria	Ciboria_caucus_SH1152459.08FU
April	0.025	75bcac2d13ceb764e310353bd7b093a7dd8bab45	Cantharellales	Ceratobasidiaceae	NA	NA
April	0.005	9fce53656f5e3b8441317f48d73186a8743b63ea	Cystofilobasidiales	Mrakiaceae	Mrakia	Mrakia_frigida_SH1556066.08FU
April	0.015	b3210310bf7d7816c5606d1eb2b085140417e4a6	Saccharomycetales	Saccharomycetales_fam_Incertae_sedis	Candida	NA
April	0.005	bff3237c59849f51fb470806de5d7f67d3d0f081	Pleosporales	NA	NA	NA
April	0.01	c9f78fb09456823628fde54bce5580eb33f7604a	Rhizophydiales	Alphamycetaceae	Betamyces	NA
April	0.015	e1c02405b9527ac6de24391a7098260965011cd9	Helotiales	Helotiaceae	Tetracladium	Tetracladium_marchalianum_SH1648788.08FU
May	0.03	0357e1a8f3b754d2940fa628d99502e4884c4bc4	Pleosporales	Torulaceae	Torula	Torula_herbarum_SH1560802.08FU
May	0.005	08747eefe079a3a06df0a1951503d9afe87c7c49	Pezizales	Pezizaceae	NA	NA
May	0.04	0cddd02b047a689616ec6e5363762a9e614fdfed	Agaricales	Typhulaceae	Typhula	Typhula_uncialis_SH1238847.08FU
May	0.02	1d3658402faf3b6c57954b575450da0777d74c60	Helotiales	NA	NA	NA
May	0.02	2aa1a9b3091f0c860e486713c148db22d1d25f8c	Filobasidiales	Piskurozymaceae	Solicoccozyma	Solicoccozyma_aeria_SH1649270.08FU
May	0.01	378202aed0b7c841084a190365d51884a06080ff	Cystofilobasidiales	Cystofilobasidiales_fam_Incertae_sedis	Mrakiella	Mrakiella_aquatica_SH1556068.08FU
May	0.015	3c5e6e869ae6437128c63db9d342a8d21fffecc8	Agaricales	Tricholomataceae	Clitocybe	Clitocybe_pruinosa_SH1509510.08FU
May	0.005	3c7847cef2ac797c004a67a88bc596246264d45a	Polyporales	Polyporaceae	Fomes	Fomes_fomentarius_SH1565944.08FU
May	0.035	3d83dfe0e515fc37b5d4e844d5af9a68e9314656	Dothideales	Dothideaceae	Dothidea	Dothidea_sambuci_SH1515070.08FU
May	0.005	40171a2f970d7aefa4d5e3bae9d74488d65f1e4f	Kriegeriales	Kriegeriaceae	NA	NA
May	0.005	4abf22aa6ca4007e7e73bceebbdc2a8bdbf7a2d3	Tremellales	NA	NA	NA
May	0.04	4ec4b31de9ba664a33dc19fca658700fc7109be7	Thelebolales	Pseudeurotiaceae	Pseudeurotium	Pseudeurotium_ovale_SH2102780.08FU
May	0.04	5ef2e02f36f3b205fd8489c0d3e4c4aab6df5ee4	Helotiales	NA	NA	NA
May	0.005	6f4671d18bdca396f1a73f80cb344e5d3f1f7846	Pucciniales	Pucciniastraceae	Pucciniastrum	Pucciniastrum_areolatum_SH1634219.08FU
May	0.03	79c0ef7140a5278ea5c9d5b8c5ce9c0c9a20dea5	Cantharellales	Ceratobasidiaceae	Ceratobasidium	NA
May	0.02	7ef6573e0b1e10d09ce7b4fe998202bd80409b02	Dothideales	Aureobasidiaceae	Kabatiella	NA
May	0.005	8513fc181fc125fe67cd4418a4450760a4176c19	Agaricales	Tricholomataceae	Xeromphalina	Xeromphalina_campanella_SH1566091.08FU
May	0.01	86a105f97669b1766ff7e242e03af6f5db9e96ce	Xylariales	Hyponectriaceae	Physalospora	Physalospora_scirpi_SH1573517.08FU
May	0.01	8c9174b3aabb73899a72b9f20e056d63f1747c8e	Auriculariales	Exidiaceae	Exidia	Exidia_candida_SH1561142.08FU
May	0.01	939d004c65df74f316f8d23de751bfed101830cd	Pleosporales	Leptosphaeriaceae	Leptosphaeria	Leptosphaeria_sclerotioides_SH1624106.08FU
May	0.05	9d02928ccf9c5d53f0af5770da441e75203afbbe	Tubeufiales	NA	NA	NA
May	0.03	a642b30bf08483d75579ad5aa30b19c18341c691	Tremellales	Cuniculitremaceae	Fellomyces	NA
May	0.02	aa3f882f5f3c37e15e90d318ecdfdde80e914a36	Agaricales	NA	NA	NA
May	0.01	aec8a33a58ea84fcdcd7519a8f78d4f355294eaf	Auriculariales	Exidiaceae	Exidiopsis	Exidiopsis_effusa_SH1561170.08FU
May	0.01	b42e9e94e9437a6587f213f2231861a6858aeaa9	Rhytismatales	Rhytismataceae	Lophodermium	Lophodermium_pinastri_SH1588036.08FU
May	0.005	b966d3bc4d64c66a2a11d8d74fb974bb9885f144	Agaricales	Physalacriaceae	Strobilurus	Strobilurus_esculentus_SH1880178.08FU
May	0.005	bfb9cb93dba923513bdf7f46b5ca7485255a6d37	Gloeophyllales	Gloeophyllaceae	Gloeophyllum	Gloeophyllum_sepiarium_SH1505693.08FU
May	0.005	ca47f864ff14417ae6d6d64438c2cf6a295320a6	Agaricales	Tricholomataceae	Mycena	Mycena_plumipes_SH1547345.08FU
May	0.005	dbb33577cb91d36a44f21be05a3925b257f6da3a	Agaricales	Bolbitiaceae	Panaeolus	Panaeolus_fimicola_SH1648515.08FU
May	0.015	dd233da65909acf8c6806c749f5c406618978f62	Pleosporales	Melanommataceae	Alpinaria	NA
May	0.035	e3848bb997edae97dfb4be955a1cdab3ecc0dc46	Cantharellales	Cantharellales_fam_Incertae_sedis	Sistotrema	NA
May	0.005	e44fda79692788b98c1bf751525616b030dd59f7	Agaricales	Physalacriaceae	Strobilurus	Strobilurus_stephanocystis_SH1519898.08FU
May	0.005	e8ed713194f55041dfd55135c1fd15ef0530f9b5	Helotiales	Helotiales_fam_Incertae_sedis	Cadophora	NA
May	0.005	f4591ab3ec965428e1a65a39006b1073b7977a87	Corticiales	Vuilleminiaceae	Vuilleminia	Vuilleminia_erastii_SH1599077.08FU
